1 Calcium-permeable AMPA receptors mediate timing-dependent LTP elicited by 6 coincident  
2 action potentials at Schaffer collateral-CA1 synapses

3

4 Running title: Modulation of threshold t-LTP

5

6 Efrain A. Cepeda-Prado<sup>1#</sup>, Babak Khodai<sup>1,3#</sup>, Gloria D. Quiceno<sup>1</sup>, Swantje Beythien<sup>1</sup>, Volkmar

7 Leßmann<sup>1,2,3,Δ,\*</sup>, Elke Edelmann<sup>1,2,3\*</sup>

8

9 <sup>1</sup>Institut für Physiologie, Otto-von-Guericke-Universität, Medizinische Fakultät, Leipziger Str. 44,  
10 39120 Magdeburg, Germany

11 <sup>2</sup>Center for Behavioral Brain Sciences, Magdeburg, Germany

12 <sup>3</sup>OVGU International ESF-funded Graduate School ABINEP, Magdeburg, Germany

13

14 # shared first authorship, \* Shared senior authorship

15 <sup>Δ</sup>correspondence: lessmann@med.ovgu.de

16

17 Keywords:

18 spike timing-dependent plasticity, STDP, hippocampus, dopamine, calcium, BDNF, t-LTP

19

20

21

22

23

24

25

26

27 **Abstract**

28

29 Activity-dependent synaptic plasticity in neuronal circuits represents a cellular model of memory  
30 formation. Such changes can be elicited by repeated high-frequency stimulation inducing long-term  
31 potentiation (LTP), or by low frequency stimulation induced long-term depression (LTD). Spike  
32 timing-dependent plasticity (STDP) can induce equally robust long-lasting timing-dependent LTP (t-  
33 LTP) in response to low frequency repeats of coincident action potential (AP) firing in presynaptic  
34 cells followed by postsynaptic neurons. Conversely, this stimulation can lead to t-LTD if the  
35 postsynaptic spike precedes the presynaptic action potential. STDP is best suited to investigate  
36 synaptic plasticity mechanisms at the single cell level. Commonly, STDP paradigms relying on 25-100  
37 repeats of coincident pre- and postsynaptic firing are used to elicit t-LTP or t-LTD. However, the  
38 minimum number of repeats required for successful STDP induction, which could account for fast  
39 single trial learning *in vivo*, is barely explored. Here, we examined low repeat STDP at Schaffer  
40 collateral-CA1 synapses by pairing one presynaptic AP with either one postsynaptic AP (1:1 t-LTP) or  
41 a burst of 4 APs (1:4 t-LTP). We found 3-6 repeats to be sufficient to elicit t-LTP. Postsynaptic  $Ca^{2+}$   
42 elevation for 1:1 t-LTP required NMDARs and L-type VGCCs, while 1:4 t-LTP depended on  
43 metabotropic GluR and ryanodine receptor signaling. Surprisingly, both 6x t-LTP variants were strictly  
44 dependent on activation of postsynaptic  $Ca^{2+}$ -permeable AMPARs. Both t-LTP forms were regulated  
45 differentially by dopamine receptors, but occurred independent from BDNF/TrkB signaling. Our data  
46 show that synaptic changes induced by only 3-6 repeats of mild STDP stimulation occurring in  $\leq 10$  s  
47 can take place on time scales observed also during single trial learning.

48

49 **Introduction**

50

51 Long-term potentiation (LTP) and long-term depression (LTD) of synaptic transmission can be  
52 observed in response to repetitive activation of synapses and are believed to represent cellular  
53 models of learning and memory processes in the brain (see e.g., Bi and Poo, 1998; Bliss and Cooke,

54 2011; Malenka and Bear, 2004). While LTP leads to a stable enhancement of synaptic transmission  
55 between connected neurons, LTD yields a long-lasting decrease in synaptic responses. Depending on  
56 the time frame that is investigated, LTP as well as LTD can be divided into an early phase lasting  
57 roughly 1h and a late phase that starts 2-3h after induction of the synaptic change. While early LTP is  
58 mediated by posttranslational modifications, late LTP was found to depend on synthesis of new  
59 proteins (Lynch, 2004; but see Wang et al., 2016). LTP was initially discovered using long-lasting high  
60 frequency stimulation of glutamatergic synapses in the mammalian hippocampus (Bliss and Lomo,  
61 1973), a brain region essential for encoding episodic memory (Tonegawa et al., 2018). While in these  
62 pioneering studies, LTP was recorded *in vivo* using extracellular field potential recordings (Bliss and  
63 Lomo, 1973), LTP is also observed in acutely isolated brain slices *ex vivo* and can be recorded in  
64 individual neurons using whole cell patch clamp recording techniques (reviewed e.g. in Herring and  
65 Nicoll, 2016; Lalanne et al., 2018; Pinar et al., 2017). Notably, LTP studies at the single cell level are  
66 essential to understand the biochemical and cellular mechanisms of LTP and LTD processes of a  
67 specific neuronal connection with defined postsynaptic target. To relate results from LTP  
68 measurements in acute slices *ex vivo* with learning processes it is important to use LTP induction  
69 protocols that resemble synaptic activation patterns also occurring during memory formation *in vivo*  
70 (compare Bittner et al., 2015; 2017; Otto et al., 1991), rather than paradigms involving tetanic  
71 synaptic stimulation or long-lasting artificial depolarization of postsynaptic neurons.

72 In this respect, spike timing-dependent plasticity (STDP) seems to represent an especially relevant  
73 protocol for induction of LTP (e.g., Bi and Poo, 2001; Caporale and Dan, 2008; Costa et al., 2017;  
74 Edelman et al., 2017; Edelman et al., 2014; Feldman, 2012; Markram et al., 2011). Here,  
75 bidirectional plasticity can be induced by repeated coincident activation of pre- and postsynaptic  
76 neurons, with forward pairing (i.e. presynaptic spike occurs several ms before the postsynaptic action  
77 potential; positive spike timing (+ $\Delta t$ ) yielding timing-dependent (t-) LTP, while backward pairing  
78 (postsynaptic spike occurs before presynaptic activation; - $\Delta t$ ) yields t-LTD. These protocols also fulfill  
79 the prerequisites for Hebbian synaptic plasticity (Caporale and Dan, 2008) that are widely accepted  
80 as fundamental requirements for synaptic plasticity. Compared to pairing protocols that induce LTP

81 by combining a presynaptic tetanus with a postsynaptic depolarization (e.g., Meis et al., 2012), STDP  
82 relies on a small number of pre- and postsynaptic action potentials that are repeated at low  
83 frequency (< 5 Hz).

84 Like memory formation *in vivo*, t-LTP in acute *ex vivo* brain slices is strongly controlled by  
85 neuromodulatory inputs, which can regulate the efficacy of induction paradigms to elicit plasticity  
86 (Edelmann and Lessmann, 2011, 2013; reviewed in Edelmann and Lessmann, 2018; Liu et al., 2017;  
87 Pawlak and Kerr, 2008; e.g., Seol et al., 2007). Such kind of neuromodulation can also bridge the  
88 temporal gap between synaptic plasticity and behavioral time scales for learning processes (Gerstner  
89 et al., 2018; Shindou et al., 2019), to connect synaptic effects to behavioral readouts. T-LTP was also  
90 reported to depend on brain-derived neurotrophic factor signaling (e.g., Edelmann et al., 2015; Lu et  
91 al., 2014; Mu and Poo, 2006; Pattwell et al., 2012; Sivakumaran et al., 2009). Still, these mechanistic  
92 studies on t-LTP employed STDP protocols depending typically on 25-100 repeats at  $\leq 1$  Hz that are  
93 unlikely to occur at synapses during memory formation *in vivo*. Therefore, in the present study we  
94 started out to determine the minimum number of repeats of coincident activation of pre- and  
95 postsynaptic neurons required for successful t-LTP induction. To this aim, we used low repeat  
96 variants of our recently described canonical (1:1 pairing: Edelmann and Lessmann, 2011) and burst  
97 STDP protocols (1:4 pairing: Edelmann et al., 2015; Solinas et al., 2019). Although, STDP protocols  
98 involving low repeat synaptic activation have been used previously to induce t-LTP (somatosensory  
99 cortex: Cui et al., 2015; Cui et al., 2016; visual cortex: Froemke et al., 2006; cultured hippocampal  
100 cells: Zhang et al., 2009), the underlying cellular mechanisms for its induction and expression  
101 remained elusive.

102 Our present study demonstrates that Schaffer collateral (SC)- CA1 t-LTP can be induced robustly by  
103 only three to six repeats of coincident pre- and postsynaptic spiking at 0.5 Hz. Moreover, our study  
104 reveals that, depending on specific STDP paradigms (i.e. 1:1 vs. 1:4) the low repeat protocols recruit  
105 distinct sources for postsynaptic  $Ca^{2+}$  elevation during induction of t-LTP, are mediated by distinct  
106 pre- and postsynaptic expression mechanisms, and are differentially regulated by dopamine receptor  
107 signaling. Together these data suggest that hippocampal SC-CA1 synapses can recruit multiple types

108 of synaptic plasticity in response to low repeat STDP protocols for processing of information and  
109 memory storage in the hippocampus. Altogether, these distinct cellular STDP pathways might form  
110 the basis for the pluripotency of hippocampal functions in learning and memory.

111

## 112 **Results**

113

### 114 **Timing-dependent LTP at Schaffer collateral-CA1 synapses requires 3-6 spike pairings**

115 Using whole cell patch clamp recordings, we investigated timing-dependent (t-)LTP at Schaffer  
116 collateral (SC) -CA1 synapses in acute hippocampal slices obtained from juvenile (i.e. P28-35) male  
117 C57BL/6J mice. T-LTP was induced by STDP protocols consisting of low repeat coincident pre- and  
118 postsynaptic action potentials at low pairing frequencies (0.5 Hz).

119 SC-CA1 synapses were repeatedly activated by pairing of an excitatory postsynaptic potential (EPSP)  
120 that was elicited by supra-threshold extracellular SC stimulation, with a single postsynaptically  
121 evoked action potential (AP; 1EPSP/1AP or 1:1,  $\Delta t = 10$  ms at 0.5 Hz; compare **Fig. 1A**). To determine  
122 the minimal repeat number required for successful t-LTP induction with a prototypical STDP  
123 paradigm, neurons were subjected to either 70, 25, 6, or 3 repeats of single spike pairings.  
124 Unexpectedly, we found that just six spike pairings with 1:1 stimulation delivered at a frequency of  
125 0.5 Hz were sufficient to induce robust potentiation of EPSP slopes to  $154.5 \pm 8.2\%$  at 30 min after  
126 induction. The t-LTP magnitude was similar to the respective magnitude of t-LTP induced with either  
127 25 or 70 repeats and significantly different from negative controls (25 x:  $145.4 \pm 9.1\%$  and 70 x:  $166.9$   
128  $\pm 11.8\%$ ; ANOVA  $F_{(4,114)} = 4,8562$   $p = 0.0012$ , STDP experiments performed with 3 x 1:1 stimulation at  
129 0.5 Hz, showed only a very slight average increase of EPSP slopes to  $104.6 \pm 22.5\%$  30 min after  
130 induction that was highly variable between cells. The average value was not significantly different  
131 from the respective EPSP slopes observed after 40 min in control neurons that were not subjected to  
132 STDP stimulation (negative controls (0:0):  $105.0 \pm 6.5\%$ ; **Fig. 1A**). The time course of changes in  
133 synaptic strength in an individual cell that was potentiated with the low repeat 1:1 protocol is  
134 depicted at the right side in blue. These data indicate that t-LTP can be induced at SC-CA1 synapses

135 with low repeat t-LTP paradigms (i.e. 6 x 1:1), that might more closely resemble the natural pattern  
 136 of pre- and postsynaptic activity that can be observed during memory formation in CA1 *in vivo* than  
 137 any high frequency or high repeat LTP protocol.

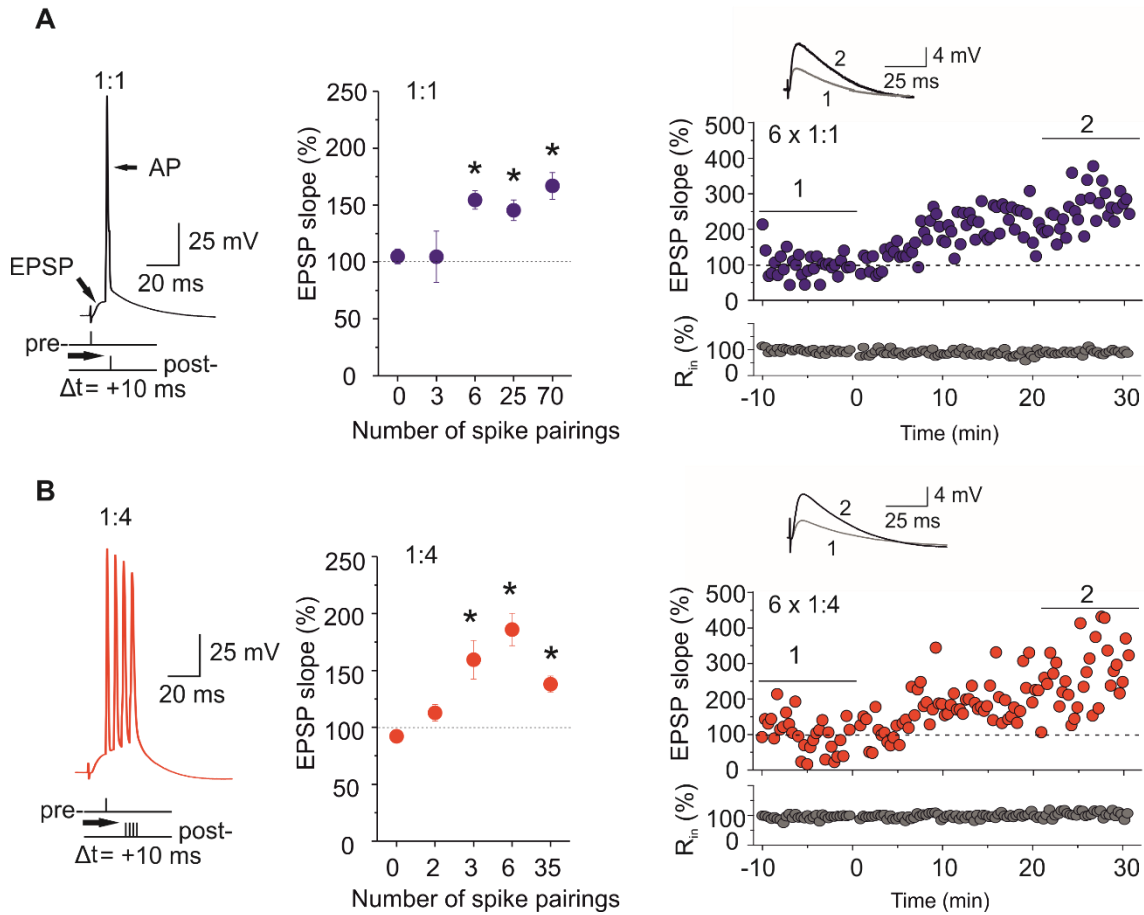

138

139 **Figure 1: Low repeat t-LTP at Schaffer collateral-CA1 synapses is dependent on stimulation pattern**  
 140 **and on the repeat number. A)** 1:1 t-LTP protocol consisting of the temporal coincident stimulation of  
 141 an EPSP and one postsynaptic action potential (AP) with a time delay of +10 ms. Summary plot  
 142 showing the average magnitude of t-LTP (EPSP slope normalized to baseline recording) in response to  
 143 variable numbers of repeats of the 1:1 t-LTP protocol delivered at 0.5 Hz. Successful t-LTP could be  
 144 induced with 6 ( $n=56/N=44$ ), 25 ( $n=26/N=6$ ) and 70 ( $n=10/N=7$ ) repeats of the 1:1 t-LTP  
 145 protocol. Three repeats did not cause any changes in synaptic strength ( $n=7/N=6$ ), and showed  
 146 similar normalized EPSP slopes as negative controls (0:0;  $n=23/N=17$ ). Right: original EPSPs and time  
 147 course of 6 x 1:1 induced potentiation recorded in an individual representative cell. **B)** 1:4 t-LTP  
 148 protocol consisting of the temporal coincident stimulation of an EPSP and four postsynaptic action  
 149 potentials (APs) with a time delay of +10 ms. Summary plot showing the average magnitude of t-LTP  
 150 (EPSP slope normalized to baseline recording) in response to variable numbers of repeats of the 1:4 t-  
 151 LTP protocol delivered at 0.5 Hz. Successful t-LTP could be induced with 3 ( $n=10/N=3$ ), 6 ( $n=10/N=6$ )

152 and 35 ( $n=10 / N=8$ ) repeats of the 1:4 t-LTP protocol. Two repeats did not cause changes in synaptic  
153 strength ( $n=10 / N=3$ ) and showed similar normalized EPSP slopes as negative controls (0:0;  $n=7 /$   
154  $N=3$ ). Right: original EPSPs and time course of 6 x 1:4 induced potentiation recorded in an individual  
155 representative cell. Averaged traces for EPSPs before and after LTP induction are shown as insets. \*  $p$   
156  $< 0.05$  ANOVA posthoc Dunnett's test. Data are shown as mean  $\pm$  SEM.

157

158 Since it has been suggested, that successful induction of t-LTP at SC-CA1 synapses requires firing of  
159 multiple postsynaptic APs (Buchanan and Mellor, 2007; Pike et al., 1999; Remy and Spruston, 2007),  
160 we incorporated a postsynaptic burst (4 APs delivered at 200 Hz) into the 6 x 1:1 protocol (**Fig. 1B**).  
161 This protocol is referred to as 6 x 1EPSP/4AP (or 6 x 1:4, **Fig. 1B**) paradigm and induced t-LTP at SC-  
162 CA1 synapses with the same efficiency as the 6 x 1:1 protocol (compare **Fig. 2C, D**). As for the  
163 canonical protocol, we determined the threshold number of repeats also for the burst protocol. As  
164 shown in **figure 1B**, successful 1:4 t-LTP could be induced by only three repeats of our burst protocol.  
165 Three ( $159.4 \pm 15.9\%$ ), 6 ( $185.9 \pm 14.2\%$ ) and 35 repeats ( $138.0 \pm 7.1\%$ ) of 1:4 stimulation all yielded  
166 significant potentiation compared to the negative control (0 x repeats ( $92.2 \pm 5.0\%$ ); ANOVA  
167  $F_{(4,42)}=9.3654$   $p<0.0001$ , posthoc Dunnett's Test: 3 x:  $p=0.0017$ ; 6 x:  $p<0.0001$ ; 35 x:  $p=0.0415$ ). The  
168 time course of change in synaptic strength of a typical cell obtained with 6 x 1:4 t-LTP stimulation is  
169 shown on the right. Since post-tetanic potentiation is lacking under these stimulation conditions, we  
170 observed for both t-LTP protocols a delayed onset ( $\sim 5$  min) and a subsequent gradual increase of t-  
171 LTP magnitude that typically proceeds until 30 min after induction, being consistent with previous t-  
172 LTP studies (compare e.g., Banerjee et al., 2009; Edelmann et al., 2015; Edelmann and Lessmann,  
173 2011; Meredith et al., 2003; Nevian and Sakmann, 2006; Pattwell et al., 2012).

174

175 For further comparison and analysis of signaling and expression mechanisms of t-LTP we focused in  
176 all subsequent experiments on the 6 repeat protocols that induced with the same number of repeats  
177 successful t-LTP for both, the canonical and the burst paradigm (indicated as 6 x 1:1 or 6 x 1:4).

178

179 **Canonical and burst containing low-repeat STDP paradigms induce Hebbian t-LTP**

180 When spike pairings were delivered with longer time delays between pre- and postsynaptic firing ( $\Delta t$ :  
 181 +20 ms) the magnitude of t-LTP declined (6 x 1:1:  $132.1 \pm 15.4\%$  and 6 x 1:4:  $118.3 \pm 9.9\%$ ).  
 182 Stimulation with short negative time delays (post-pre;  $\Delta t$ : -15 ms) did neither induce t-LTP nor  
 183 significant t-LTD (6 x 1:1:  $86.9\% \pm 9.6\%$ ; 6 x 1:4:  $100.3 \pm 9.8\%$ ; **Fig. 2A, B**).

184

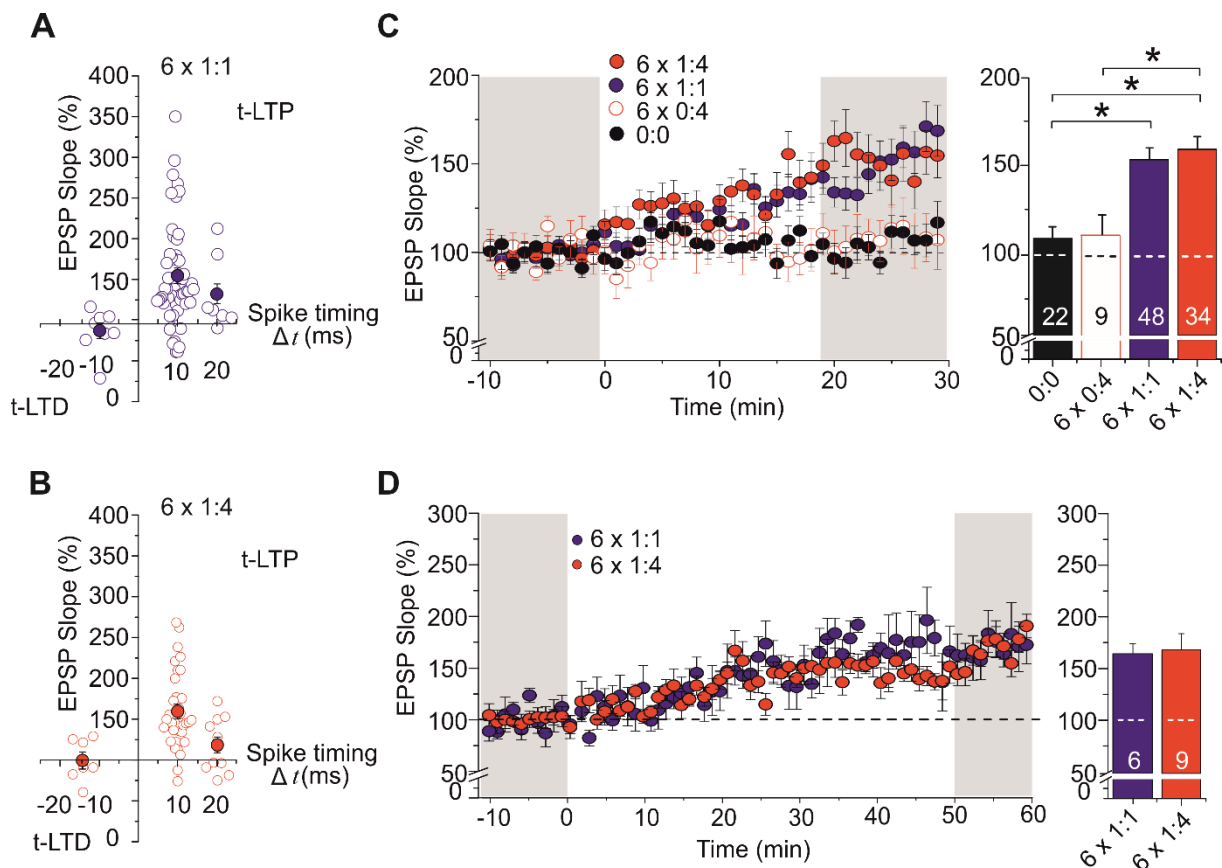

185

186 **Figure 2: Comparison of canonical and burst low repeat STDP paradigms.** STDP plots for 6 x 1:1 (A,  
 187 blue) and 6 x 1:4 (B, red) protocols. Changes in synaptic strength are shown for different intervals  
 188 between start of the EPSP and postsynaptic APs. Groups of cells at +10 ms interval (standard), with  
 189 longer time interval (+20 ms) or with negative spike pairings (-15 ms) are shown. Each open circle  
 190 represents the result for an individual CA1 neuron. Mean values are shown as closed circles. C) The  
 191 time courses of t-LTP expression did not differ between 6 x 1:1 (n= 48 / N= 44) and 6 x 1:4 (n=34 /  
 192 N=27) paradigms, but they were significantly different from negative controls (0:0; n=22 / N=17) and  
 193 unpaired controls (6 x 0:4; n=9 / N=7). The average magnitude of t-LTP is shown in the bar graphs. D)  
 194 Extended measurements for 1 hour after t-LTP induction for both low repeat STDP protocols (6 x 1:1:  
 195 n=6 / N=6, 6 x 1:4: n=9 / N=8). Data are shown as mean  $\pm$  SEM, bar scales are shown in the insets.



196

197 In general, the magnitude of t-LTP induced with the 6 x 1:4 stimulation ( $159.60 \pm 8.00\%$ ) was  
198 comparable to that observed for 6 x 1:1 stimulation ( $153.65 \pm 8.24\%$ ;  $p > 0.05$ , compare **Fig. 2C**).  
199 Eliciting only postsynaptic bursts without pairing to presynaptic stimulation (6 x 0:4;  $110.08 \pm$   
200  $11.90\%$ ) did not yield significant potentiation compared to negative controls (0:0;  $108.6 \pm 7.11\%$ ,  $p >$   
201  $0.05$ ; **Fig. 2C**). Importantly, these results demonstrate that repeated postsynaptic burst firing alone  
202 does not induce any change in synaptic strength, indicating hebbian features for our low repeat t-LTP  
203 protocols, thereby delimiting our protocols from non-hebbian behavioral time scale synaptic  
204 plasticity recently reported for hippocampal places cells (Bittner et al., 2017). Prolonged patch clamp  
205 recordings carried out for 1 hour after pairing showed that both low repeat STDP paradigms yielded  
206 at 60 min comparable t-LTP magnitudes as observed 30 min after pairing. These data demonstrate  
207 that both low-repeat protocols enable longer lasting changes in synaptic transmission without any  
208 decline in magnitude. Moreover, the overall time course of the potentiation was indistinguishable for  
209 both types of low repeat t-LTP (**Fig. 2D**, potentiation after 1h: 6 x 1:1:  $164.0 \pm 9.5\%$  and for 6 x 1:4:  
210  $168.0 \pm 14.8\%$ ,  $t_{(13)} = -0.20435$   $p = 0.84155$ ). Together, these findings indicate that the low repeat STDP  
211 paradigms identified in this study induce Hebbian plasticity selectively at short positive spike timings  
212 with similar properties as have been described in earlier studies using high repeat canonical and  
213 burst type STDP protocols (e.g., Bi and Poo, 1998; Edelman et al., 2015; Froemke et al., 2006).

214 In the next series of experiments, we determined the mechanisms of induction and expression as  
215 well as the intracellular signaling cascades involved in modulation of both types of low repeat t-LTP.

216

### 217 **Influence of single and multiple postsynaptic action potentials on t-LTP expression**

218 To investigate whether the low repeat STDP paradigms introduced here, rely on pre- or postsynaptic  
219 expression mechanisms of synaptic plasticity, we determined changes in the paired pulse ratio (PPR)  
220 before and 30 min after t-LTP induction that was obtained when two successively evoked EPSPs were  
221 elicited at 50 ms inter-stimulus interval (**Fig. 3A**). Commonly, a decrease in PPR after induction of LTP  
222 is interpreted as an increase in transmitter release probability and would be expected in case of

223 presynaptically expressed synaptic plasticity. When t-LTP was induced with the 6 x 1:1 paradigm we  
224 found on average in fact a significant decrease in PPR (before:  $1.91 \pm 0.1$ , after:  $1.7 \pm 0.1$ ; paired  
225 Student's t-test,  $t_{(34)} = 2.3471$ ;  $p = 0.0249$ , whereas the PPR remained unchanged after inducing 6 x 1:4  
226 t-LTP (before:  $1.78 \pm 0.13$ ; after:  $1.6 \pm 0.1$ ; paired Student's t-test,  $t_{(20)} = 1.0146$ ;  $p = 0.3224$ ; for  
227 negative controls: before:  $1.77 \pm 0.07$ , after:  $1.80 \pm 0.12$ ; paired Student's t-test,  $t_{(20)} = -0.3494$ ;  $p =$   
228  $0.7305$ ; **Fig. 3A**). This decreased PPR after induction of 6 x 1:1 t-LTP hints at a presynaptic expression  
229 mechanism. In contrast, the PPR analysis clearly speaks against any presynaptic contribution in the  
230 expression of 6 x 1:4 t-LTP. Interestingly, the initial PPR before inducing t-LTP was not significantly  
231 different between the tested groups (negative control (0:0):  $1.77 \pm 0.07$ ; 6 x 1:1:  $1.91 \pm 0.1$ ; 6 x 1:4:  
232  $1.78 \pm 0.13$ ; Kruskal-Wallis test,  $H_{(2)} = 0.8503$ ;  $p = 0.6537$ ), indicating that the initial release  
233 probability was similar and a stable basal parameter in our slices. As additional measures for a  
234 presynaptic expression mechanism, we determined miniature EPSCs and coefficient of variation (CV)  
235 analysis before and after successful induction of our 6x 1:1 t-LTP (**Fig. S1**, compare Bender et al.,  
236 2009; Edelman et al., 2015). The results of both types of analysis are consistent with presynaptic  
237 expression of 6 x 1:1 t-LTP, as the overall mean for CV after LTP was decreased (before:  $0.47 \pm 0.02$ ,  
238 after:  $0.39 \pm 0.02$ , and miniature EPSC frequencies (determined as shorter inter event intervals (IEI))  
239 were increased after 6 x 1:1 t-LTP induction (see **Fig. S1**).

240

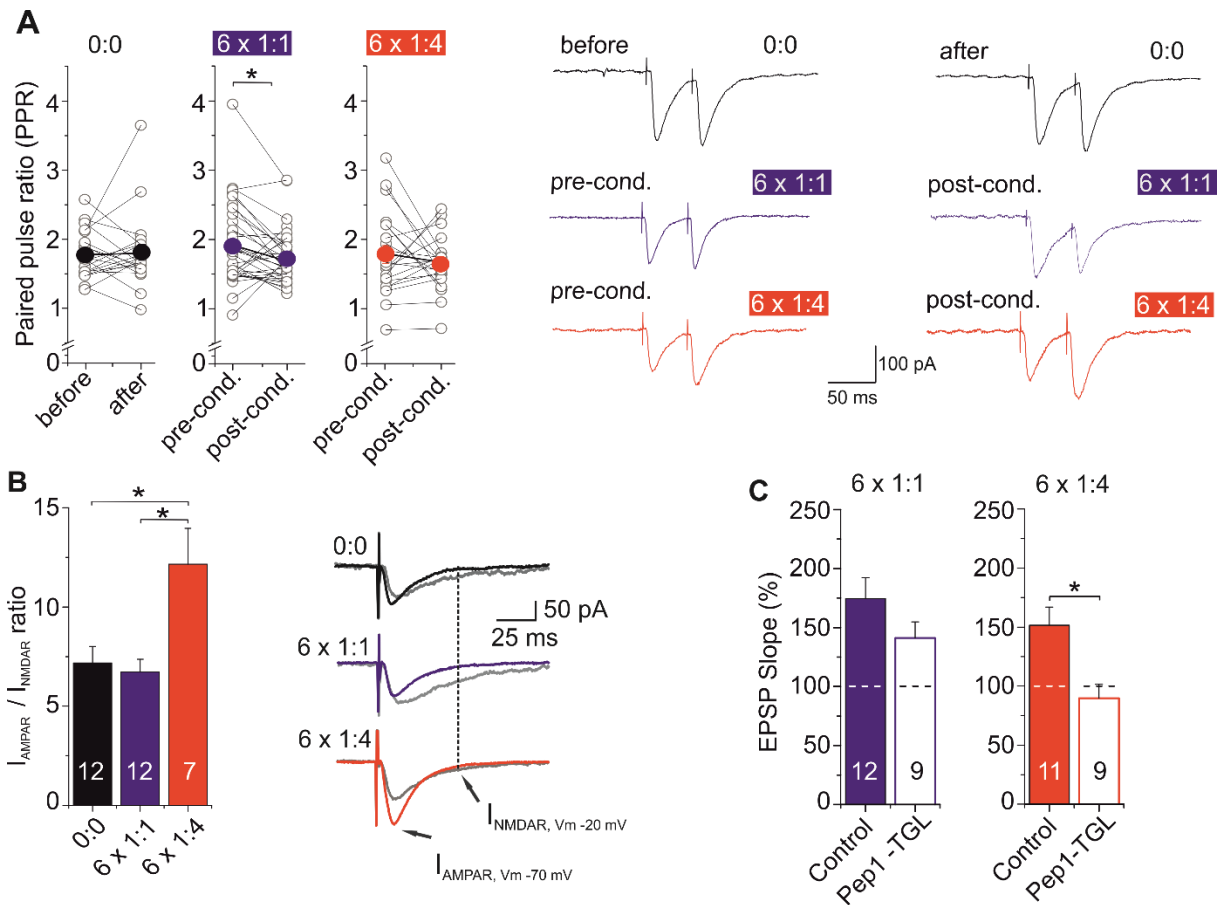

241

242 **Figure 3: Different loci of expression for t-LTP induced by the low repeat 1:1 and 1:4 paradigms. A)**

243 Paired pulse ratio (PPR) calculated before (pre-cond.) and 30 min after (post-cond.) t-LTP induction, or

244 at the beginning and the end of measurements in negative controls (0:0: n=21 / N=6) and following t-

245 LTP induction (6 x 1:1: n=35 / N=12; 6 x 1:4: n=21 / N=7). **B)** Right: original traces of AMPAR mediated

246 currents recorded in voltage clamp at -70 mV holding potential ( $V_m$ ) and NMDAR (gray) mediated

247 currents at -20 mV holding potential. Left: ratio of AMPA/NMDA receptor mediated currents (AMPA:

248 peak current at -70 mV; NMDAR: current amplitude 50 ms after start of EPSC, recorded at -20 mV) for

249 negative controls (0:0: n=12 / N= 9) and after induction of t-LTP with both low repeat paradigms (6 x

250 1:1: n= 12 / N=11; 6 x 1:4: n= 7 / N= 5). **C)** Intracellular application of Pep1-TGL (inhibiting membrane

251 insertion of GluA containing AMPARs) via patch pipette blocked 6 x 1:4 t-LTP, whereas 6 x 1:1 t-LTP

252 remained intact (6 x 1:1: ACSF; n= 12 / N= 10, Pep1-TGL n= 9 / N= 7 and 6 x 1:4: ACSF n= 11 / N= 11,

253 Pep-TGL n= 9 / N= 7). Data are shown as mean  $\pm$  SEM. Scale bars are shown in the figures.

254

255 To further address the locus of expression of 6 x 1:1 and 6 x 1:4 t-LTP, we analyzed the changes in

256 AMPA/NMDA receptor (R) mediated current ratios 30 min after inducing t-LTP. AMPAR mediated

257 peak EPSCs were recorded at a holding potential of -70 mV, while NMDAR mediated current

258 components were determined as remaining current 50 ms after the peak EPSC recorded at -20 mV to  
259 avoid large current fluctuations of holding currents that are typically observed at positive membrane  
260 potentials. The AMPAR/NMDAR ratio analysis revealed a strong and statistically significant increase  
261 in AMPAR- vs. NMDAR-mediated excitatory postsynaptic currents (EPSCs) following the induction of  
262 6 x 1:4 t-LTP but not when inducing 6 x 1:1 t-LTP, or in non-STDP stimulated control cells (0:0:  
263 7.18±0.82, 1:1: 6.72 ± 0.65, 1:4: 12.15 ± 1.81; ANOVA  $F_{(2, 34)} = 7.979$ ;  $p = 0.0014$ , **Fig. 3B**). Since  
264 recording of NMDAR mediated currents at -20 mV (instead of +40 mV) results in smaller current  
265 amplitudes we might have introduced a larger error. However, since all groups (negative control, 6 x  
266 1:1 and 6 x 1:4) were handled identically in this respect, the significant change specifically after t-LTP  
267 induction with 6 x 1:4 protocol, clearly points to a strong increase of postsynaptic AMPAR  
268 conductance, which is absent in the other groups. As an increase in AMPAR/NMDAR mediated  
269 currents after inducing LTP is commonly explained by the insertion of new GluA1 containing AMPARs  
270 into the postsynaptic spine (Chater and Goda, 2014; Edelmann et al., 2015; Lee and Kirkwood, 2011;  
271 Morita et al., 2014) these data strongly suggest a postsynaptic mechanism of expression selectively  
272 for the 6 x 1:4 t-LTP. Nevertheless, the AMPAR/NMDAR ratio can also be increased by postsynaptic  
273 mechanisms other than AMPAR receptor insertion (such as e.g. phosphorylation). Thus, we next  
274 investigated whether the 6 x 1:4 t-LTP is mediated specifically by incorporation of GluA1 containing  
275 AMPARs. To this aim, we loaded the postsynaptic cells with Pep1-TGL via the patch pipette solution  
276 and induced t-LTP with both 6 repeat t-LTP paradigms (compare Edelmann et al., 2015). Pep1-TGL  
277 contains the last three amino acids of the C-terminus of the GluA1 subunit, which are required for its  
278 insertion into the plasma membrane (Hayashi et al., 2000; Shi et al., 2001). The postsynaptic  
279 application of Pep1-TGL resulted in a complete block of 6 x 1:4 t-LTP (control: 151.42 ± 15.44, Pep1-  
280 TGL: 89.62 ± 11.92; Mann-Whitney U test,  $U = 14.0$ ;  $p = 0.007$ ). In contrast, t-LTP induced with the 6 x  
281 1:1 protocol remained intact under the same recording conditions (control: 174.56 ± 17.86, Pep1-  
282 TGL: 141.13.71; Mann-Whitney U test,  $U = 36.0$ ;  $p = 0.201$ , **Fig. 3C**). Together with the PPR analysis  
283 and the AMPA/NMDAR ratios, these data suggest a dominant postsynaptic locus of expression for  
284 the 6 x 1:4 t-LTP. In contrast, the absence of any change in AMPA/NMDAR current ratio and AMPAR

285 insertion, in conjunction with the decreased PPR, decreased CV (paired student's t-test:  $t_{(48)}=4.5874$ ;  
286  $p < 0.0001$ ), and increased mEPSC frequency (Kolmogorov-Smirnov 2sample test:  $Z=1.5745$ ,  $p=$   
287  $0.0132$ ; compare **Fig. S1**) indicate a prevailing presynaptic locus of expression for the 6 x 1:1 t-LTP.  
288 These findings are consistent with our previous results obtained with high repeat t-LTP protocols  
289 (Edelmann et al., 2015). The data suggest that the number of postsynaptic spikes fired during  
290 induction of low repeat t-LTP decides whether associative Hebbian synaptic plasticity is expressed by  
291 pre- or by postsynaptic mechanisms, whereas the locus of t-LTP expression does not seem to depend  
292 on the number of repeats of a specific t-LTP paradigm.

293

#### 294 **Distinct calcium sources are recruited for induction of low repeat STDP paradigms**

295 There is a general consensus that induction of long-lasting changes in synaptic strength at SC-CA1  
296 synapses requires a postsynaptic rise in intracellular calcium concentration ( $[Ca^{2+}]_i$ ) via NMDA  
297 receptors (NMDARs, Nicoll and Malenka, 1995). Likewise, also intracellular  $Ca^{2+}$  elevation resulting  
298 from synchronous activation of NMDARs, L-type voltage-gated  $Ca^{2+}$  channels (VGCC), and release of  
299  $Ca^{2+}$  from internal stores, together with activation of metabotropic glutamate receptors (mGluRs)  
300 and subsequent activation of  $IP_3$  receptors might be responsible for postsynaptic STDP induction  
301 (Tigaret et al., 2016). Accordingly, we investigated the sources for the intracellular  $Ca^{2+}$  elevation  
302 triggering the 6 x 1:1 and 1:4 t-LTP. Interestingly, the 6 x 1:1 t-LTP was significantly impaired when it  
303 was executed either in the presence of the specific NMDAR antagonist APV (50  $\mu$ M; Control:  $159.73 \pm$   
304  $15.23$ , APV:  $110.91 \pm 14.22$ ; unpaired Student's t-test,  $t_{(26)} = 2.348$ ;  $p = 0.0268$ ; **Fig. 4A**), or in the  
305 presence of the L-type VGCC blocker Nifedipine (25  $\mu$ M; DMSO:  $180.11 \pm 17.32$ , Nifedipine:  $90.19 \pm$   
306  $12.15$ ; unpaired Student's t-test,  $t_{(14)} = 4.25$ ;  $p = 0.0008$ ; **Fig. 4C**). In contrast, neither APV (50  $\mu$ M,  
307 unpaired Student's t-test,  $t_{(22)} = 1.016$ ;  $p = 0.3207$ ; **Fig. 4B**) nor Nifedipine (25  $\mu$ M, Mann-Whitney U  
308 test,  $U = 20.0$ ;  $p = 0.6620$ , **Fig. 4D**) inhibited t-LTP induced with the 6 x 1:4 protocol (for 6 x 1:4:  
309 Control:  $157.55 \pm 19.71$ , APV:  $137.95 \pm 8.39$  and DMSO:  $159.75 \pm 10.81$ , Nifedipine:  $171.73 \pm 13.62$ ).  
310 These data demonstrate that postsynaptic  $Ca^{2+}$  influx via NMDAR and L-type VGCC is required for 6 x  
311 1:1 t-LTP but not for 6 x 1:4 t-LTP induction.

312

313

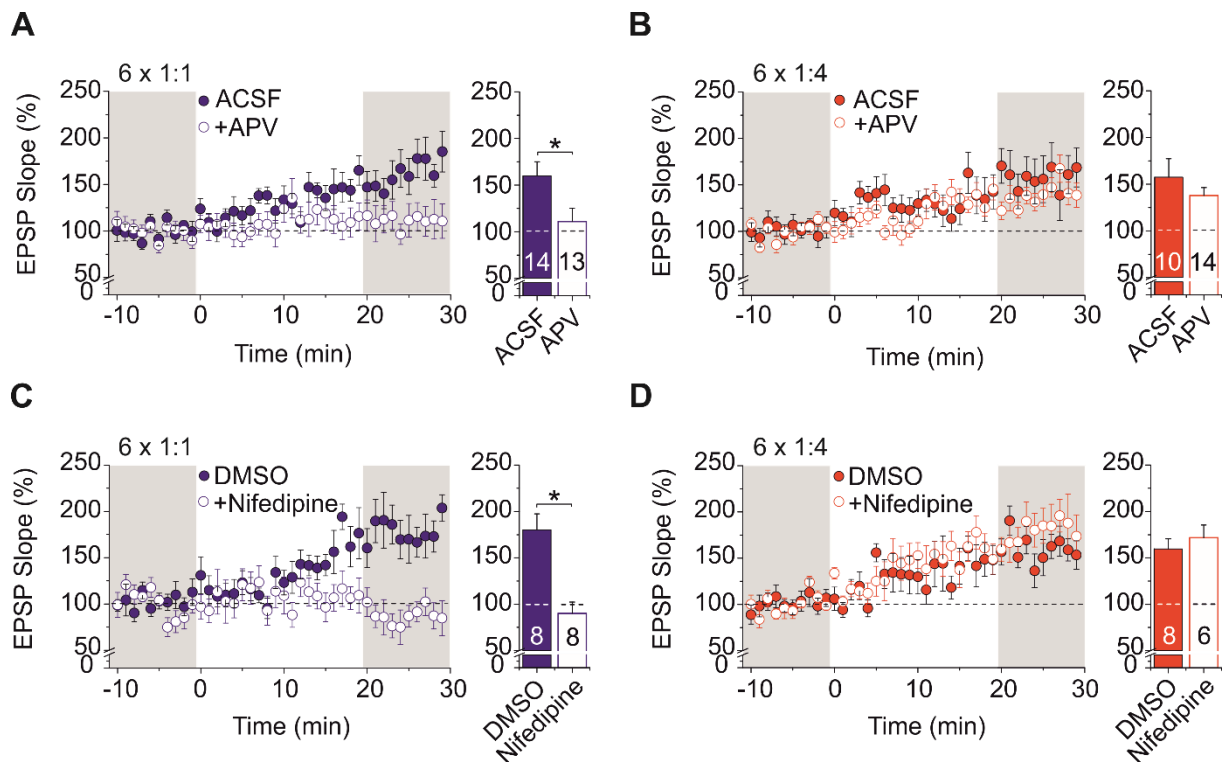

314

315 **Figure 4: Contribution of NMDA receptors and VGCCs to the induction of 6 x 1:1 and 6 x 1:4 t-LTP.**

316 *Effects of bath applied NMDAR antagonist APV (50  $\mu$ M) and L-type voltage-gated calcium channel*  
 317 *(VGCC) inhibitor Nifedipine (25  $\mu$ M) on low repeat t-LTP. Inhibition of either NMDARs (A) or L-type*  
 318 *VGCCs (C) completely blocked 6 x 1:1 t-LTP (A: 6 x 1:1: ACSF n=14 / N=8, APV n= 13 / N= 12; C: DMSO*  
 319 *control n= 8 / N=7, Nifedipine n=8 / N=7). (B) 6 x 1:4 t-LTP remained unaffected by application of the*  
 320 *NMDAR inhibitor APV (6 x 1:4: ACSF n=10 / N=6, APV n=14 / N=9). (D) 6 x 1:4 t-LTP was not inhibited in*  
 321 *the presence of the L-type VGCC inhibitor nifedipine (DMSO n=8 / N=4, Nifedipine n=6 / N=4). Average*  
 322 *time course of potentiation and mean ( $\pm$  SEM) magnitude of t-LTP are shown for the respective*  
 323 *experiments.*

324

325 To verify a role of postsynaptic  $Ca^{2+}$  signaling in the induction of 6 x 1:4 t-LTP, we loaded postsynaptic  
 326 neurons with 10 mM of the  $Ca^{2+}$  chelator BAPTA via the patch pipette solution (Fig. 5A). After  
 327 obtaining the whole cell configuration, the BAPTA containing internal solution was allowed to  
 328 equilibrate for 30 min before t-LTP induction. Likewise, in the respective control experiments t-LTP  
 329 was also induced 30 min after breaking the seal. As shown in figure 5A, buffering of intracellular  $Ca^{2+}$

330 signals with BAPTA resulted in a complete impairment of 6 x 1:4 t-LTP (Control:  $150.28 \pm 12.07$ ,  
 331 BAPTA<sub>i</sub>:  $104.80 \pm 5.84$ ; Mann-Whitney U test,  $U = 3.0$ ;  $p = 0.0303$ ), indicating that a rise in  
 332 postsynaptic  $[Ca^{2+}]_i$  is indeed required also for the induction of 6 x 1:4 t-LTP.

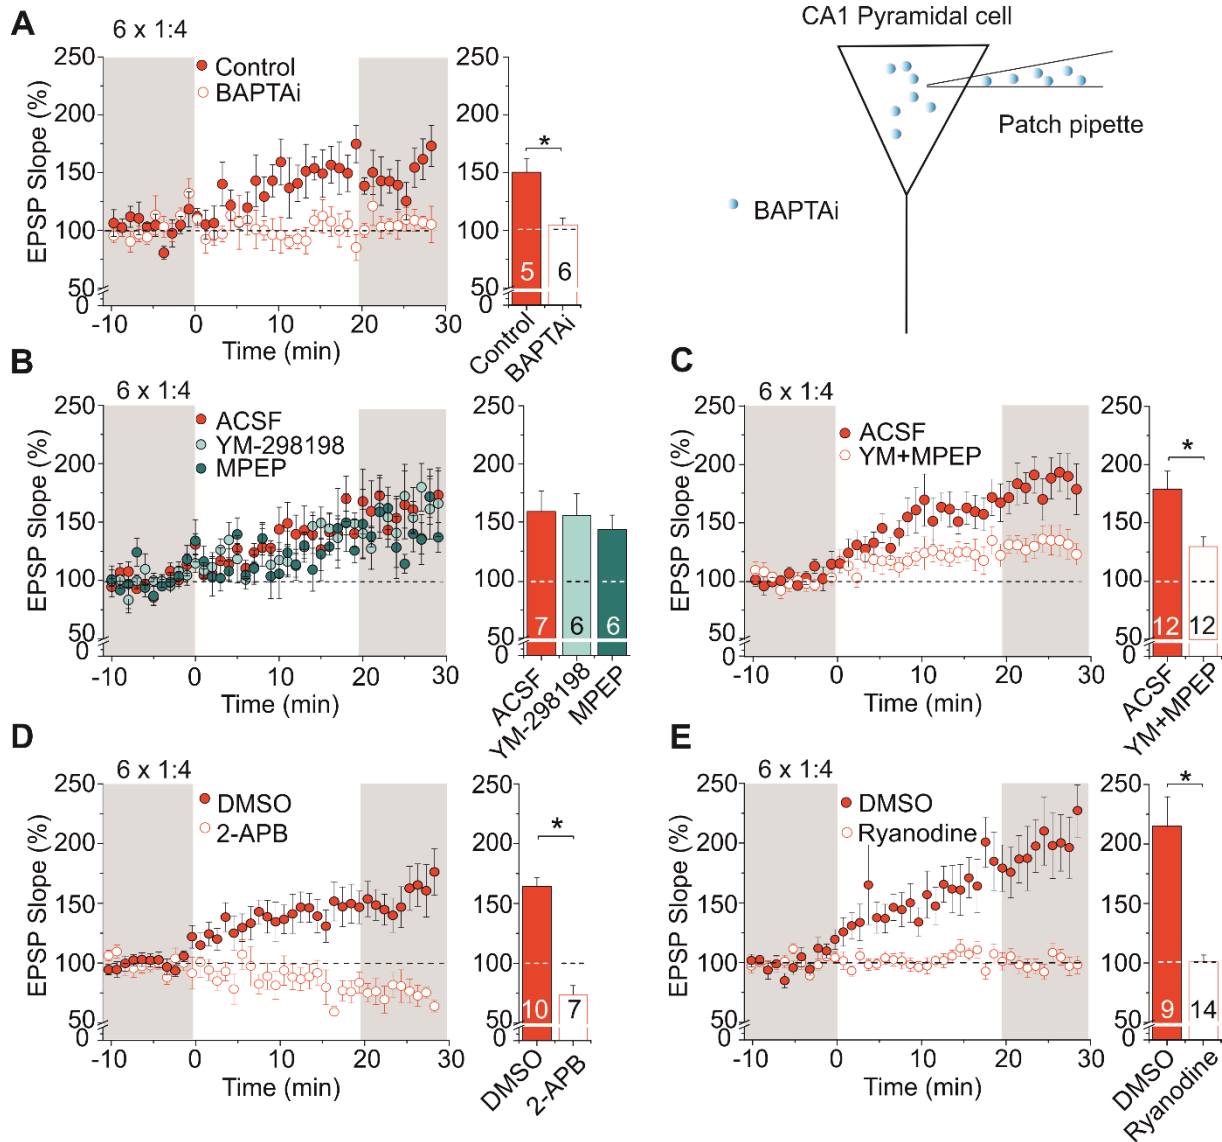

333  
 334 **Figure 5: Contribution of group I mGluRs, IP3 receptors and ryanodine receptor-dependent calcium**  
 335 **release from internal stores to 6 x 1:4 t-LTP. A)** Inclusion of 10 mM BAPTA in the pipette solution and  
 336 equilibration with the cell interior for 30 min before t-LTP induction (open circles) prevented t-LTP  
 337 induced by 6 x 1:4 stimulation compared to identically treated (i.e. t-LTP induction 30 min after  
 338 breaking the patch) control cells (closed circles; Control:  $n=5 / N=5$ , BAPTA<sub>i</sub>:  $n=6 / N=4$ ), indicating the  
 339 necessity of postsynaptic calcium elevation to induce t-LTP. The inset depicts the loading of the cell  
 340 with BAPTA. **B)** T-LTP induced with the 6 x 1:4 protocol was neither affected by bath application of the  
 341 mGluR1 antagonist YM-298198 (1  $\mu$ M; ACSF:  $n=7 / N=5$ , YM-298198:  $n=6 / N=3$ ), nor by the mGluR5  
 342 antagonist MPEP (10  $\mu$ M,  $n=6 / N=4$ ). **C)** However, co-application of both antagonists (YM-298198



343 *and MPEP; ACSF n=12 / N=8, YM-MPEP n=12 / N=5) significantly reduced synaptic potentiation. D)*  
344 *Inhibition of IP<sub>3</sub> receptors by 100 μM 2-APB (in 0.05% DMSO) completely blocked 6 x 1:4 t-LTP (DMSO*  
345 *n=10/ N=5; 2-APB n=7/ N=3). E) Wash in of 100 μM ryanodine into the postsynaptic neuron via the*  
346 *patch pipette inhibited t-LTP induced by 6 x 1:4 stimulation (DMSO n= 9 / N= 4; Ryanodine n= 14 / N=*  
347 *5). Average time course of potentiation and mean (± SEM) magnitude of t-LTP are shown for the*  
348 *respective experiments.*

349

350 Since induction of t-LTP involves repeated glutamate release that, according to hebbian rules, should  
351 contribute to the induction process, we next tested the involvement of metabotropic glutamate  
352 receptors (mGluRs) in 6 x 1:4 t-LTP. In the hippocampal CA1 region mGluR<sub>1</sub> and mGluR<sub>5</sub> are widely  
353 expressed and have been reported to induce Ca<sup>2+</sup> release from internal calcium stores during LTP  
354 (e.g., Balschun et al., 1999; Neyman and Manahan-Vaughan, 2008; Wang et al., 2016). Nevertheless,  
355 blocking mGluR activation by bath application of antagonists of either mGluR<sub>1</sub> (YM-298198 10 μM) or  
356 mGluR<sub>5</sub> (MPEP, 10 μM) alone, did not affect the magnitude of 6 x 1:4 t-LTP compared to ACSF  
357 controls (Control: 159.07 ±17.67; YM: 155.65 ± 18.70; MPEP: 143.51 ± 12.43; Kruskal-Wallis test, H<sub>(2)</sub>  
358 = 0.2774; p =0.8705; **Fig. 5B**). However, coapplication of the mGluR<sub>1</sub> and mGluR<sub>5</sub> antagonists  
359 significantly reduced the 6 x 1:4 t-LTP magnitude (Control: 178,99 ± 15.29; YM+MPEP: 129.97 ± 7.94;  
360 unpaired Student's t-test, t<sub>(22)</sub> = 2.248; p= 0.0093; **Fig. 5C**), indicating that the activation of one of  
361 these receptors alone (either mGluR<sub>1</sub> or mGluR<sub>5</sub>) is sufficient and required to support 6 x 1:4 t-LTP.  
362 To investigate whether mGluR mediated Ca<sup>2+</sup> release from internal stores contributes to 6 x 1:4 t-LTP  
363 we used 2-APB as an inhibitor of IP<sub>3</sub>-receptors. As expected inhibition of IP<sub>3</sub>-mediated Ca<sup>2+</sup> release  
364 completely blocked t-LTP (DMSO: 164.30 ± 18.29; 2-ABP: 71.87± 7.54; unpaired Student's t-test,  
365 t<sub>(15)</sub>=4.0297; p =0.0019, **Fig. 5D**).

366 To test for involvement of ER-resident ryanodine receptors (RyR) in the low repeat burst protocol, we  
367 applied 100 μM ryanodine (a concentration known to irreversibly inhibit RyR; Gao et al., 2005) via  
368 the patch pipette into the recorded postsynaptic neurons. As expected in case of RyR involvement, 6  
369 x 1:4 t-LTP induction was completely inhibited under these conditions (DMSO: 216.21 ± 25.70;  
370 Ryanodine: 100.24 ± 5.07; Mann-Whitney U test, U= 5.5; p = 0.0003; **Fig. 5E**). These data



371 demonstrate that  $\text{Ca}^{2+}$  release from the ER is a critical component of 6 x 1:4 t-LTP. Thus, the  
372 postsynaptic  $\text{Ca}^{2+}$  elevation required for induction of 6 x 1:4 t-LTP seems to involve  $\text{mGluR}_1$  or  $\text{mGluR}_5$   
373 mediated release of  $\text{Ca}^{2+}$  from the ER via IP3 receptors and subsequent  $\text{Ca}^{2+}$  induced  $\text{Ca}^{2+}$  release via  
374 RyRs.

375

376 **Distinct dopaminergic modulation of different low repeat t-LTP protocols at Schaffer collateral-CA1**  
377 **synapses**

378 Dopamine (DA) serves as an important neuromodulator in learning and memory formation, as well in  
379 synaptic plasticity mechanisms underlying both phenomena. DA receptors in the brain are classified  
380 into two main families: D1-like receptors that include D1 and D5, and D2-like receptors that include  
381 D2, D3 and D4 (Missale et al., 1998). It has been shown that activation of D1/D5 receptors has a  
382 particularly strong influence on synaptic efficacy (e.g., Dubovyk and Manahan-Vaughan, 2018;  
383 Papaleonidopoulos et al., 2018), and that treatment of cultured hippocampal neurons with  
384 exogenous DA (20  $\mu\text{M}$ ) reduces the induction threshold for t-LTP from 60 to 10 spike pairings (Zhang  
385 et al., 2009). To examine whether in our case, endogenous DA signaling is an essential component of  
386 synaptic mechanisms triggering low repeat t-LTP, we investigated the effect of specific bath applied  
387 antagonists for D1-like and D2-like DA receptors (D1: SCH23390 (SCH), 10  $\mu\text{M}$ ; D2: Sulpiride (Sulp), 10  
388  $\mu\text{M}$ ). We found that t-LTP induced with 6 x 1:1 stimulation was blocked completely when SCH23390  
389 and Sulpiride were coapplied (Control:  $174.15 \pm 15.26$ , SCH:  $165.84 \pm 18.03$ , Sulp:  $136.23 \pm 12.99$ ,  
390 SCH+Sulp:  $93.02 \pm 9.03$ ; ANOVA  $F_{(3,36)} = 6.2519$ ;  $p = 0.0016$ , posthoc Tukey -test for ACSF vs SCH+Sulp  
391  $p = 0.0015$  and for SCH vs SCH+Sulp:  $p = 0.0091$ ), whereas application of either the D1-like or the D2-  
392 like receptor antagonist alone did not significantly reduce the magnitude of the 6 x 1:1 t-LTP (**Fig.**  
393 **6A**). In contrast, the 6 x 1:4 t-LTP was dependent exclusively on D2-like receptor signaling, as was  
394 evident from complete inhibition of this burst t-LTP in the presence of Sulpiride (significantly  
395 different from ACSF controls; Kruskal-Wallis test  $H_{(3)} = 12.65$ ;  $p = 0.005$ , **Fig. 6B**), whereas SCH23390  
396 was without effect (Control:  $147.51 \pm 8.25$ , SCH:  $153.64 \pm 14.47$ , Sulp:  $102.34 \pm 12.25$ , SCH+Sulp:  
397  $108.67 \pm 9.17$ ).

398

399

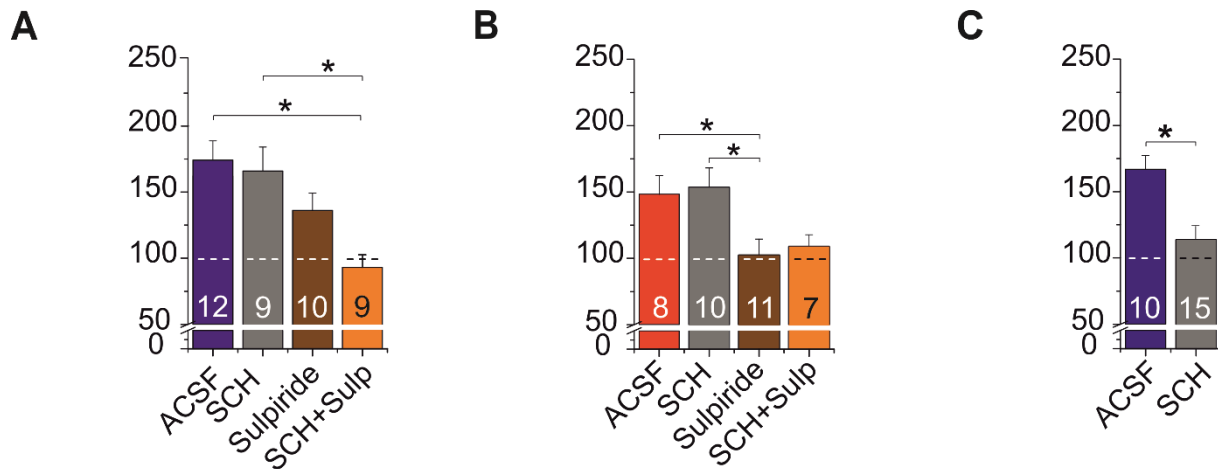

400

401 **Figure 6: Differential modulation of canonical and burst low repeat t-LTP by dopaminergic**  
 402 **signaling. A)** Dependence of 6 x 1:1 t-LTP on D1 and D2 receptor signaling. Neither bath application  
 403 of SCH23390 (SCH, D1-like antagonist; 10  $\mu$ M) nor bath application of Sulpiride (Sulp, D2-like  
 404 antagonist; 10  $\mu$ M) alone impaired t-LTP (ACSF: n=12 / N=9; SCH23390 n=9 / N=6; Sulpiride n=10 /  
 405 N=8). However, co-application of both antagonists significantly reduced t-LTP (SCH + Sulp n=9 / N=4).  
 406 **B)** T-LTP induced with the 6 x 1:4 protocol was impaired in the presence of Sulpiride, but not further  
 407 reduced by co-application with SCH23390. Accordingly, application of SCH23390 alone did not affect  
 408 6 x 1:4 t-LTP (ACSF: n=8 / N=6; SCH23390 n=10 / N=5; Sulpiride n=11 / N=8; SCH + Sulp n=7 / N=4). **C)**  
 409 T-LTP induced with the high repeat (70 x) 1:1 protocol was inhibited in the presence of the D1  
 410 receptor antagonist SCH23390 (10  $\mu$ M) in mouse slices (ACSF n=10 / N=8; SCH23390 n=15 / N=5) to a  
 411 similar extent as observed previously in rat hippocampal slices (Edelmann and Lessmann, 2011).  
 412 Mean ( $\pm$  SEM) magnitude of t-LTP is shown for the respective experiments.

413

414 Together, these data indicate that 6 x 1:1 t-LTP depends on D1/D2 receptor co-signaling whereas 6 x  
 415 1:4 t-LTP is only dependent on D2 receptors, highlighting a novel and important role of D2 receptors  
 416 in both types of t-LTP. This is at variance with the fact that most previous studies investigating DA-  
 417 dependent conventional LTP at SC-CA1 synapses reported an eminent role of D1-like receptors in  
 418 high frequency induced LTP forms (e.g., Hagena and Manahan-Vaughan, 2016; Papaleonidopoulos et  
 419 al., 2018). However, our results are fully consistent with the previously described D2 receptor  
 420 mediated enhancement of t-LTP in the prefrontal cortex (Xu and Yao, 2010), and the prominent role

421 of D2 receptors in hippocampus-dependent learning (Nyberg et al., 2016). A classical role for D1  
422 receptor signaling was also described for high repeat (70 x) canonical t-LTP in rat hippocampal slices  
423 (Edelmann and Lessmann, 2011, 2013). To clarify whether repeat number or species matter for the  
424 contribution of D1 and D2 receptors in t-LTP, we examined DA dependence of high repeat 70 x 1:1 t-  
425 LTP in mouse hippocampal slices. We found that also in mouse slices 70 x 1:1 t-LTP was fully blocked  
426 by bath application of the D1 antagonist SCH23390 (Control:  $166.85 \pm 11.77$ , SCH:  $113.38 \pm 11.07$ ;  
427 unpaired Student's t-test,  $t_{(22)} = 3.028$ ;  $p = 0.0062$ ; **Fig. 6C**). These data reveal that high repeat  
428 number induced t-LTP is regulated by D1 signaling whereas D2 signaling is selectively involved in low  
429 repeat t-LTP. Further, the extent of D2 receptor involvement in low repeat t-LTP is regulated by the  
430 postsynaptic spike pattern used for t-LTP induction (compare **Fig. 6A and B**).

431

#### 432 **The role of BDNF/TrkB signaling in low repeat t-LTP induced by canonical or burst protocols**

433 We recently showed for SC-CA1 synapses that brain-derived neurotrophic factor (BDNF) induced  
434 tropomyosin related kinase B (TrkB) signaling mediates t-LTP elicited by a 1:4 t-LTP paradigm with 25  
435 repeats at 0.5 Hz. This t-LTP is driven by an autocrine postsynaptic BDNF/TrkB mechanism that  
436 ultimately relies on postsynaptic insertion of new AMPA receptors (Edelmann et al., 2015). To  
437 address whether release of endogenous BDNF might be involved also in low repeat t-LTP, we next  
438 tested our low repeat t-LTP protocols in slices obtained from heterozygous BDNF knockout (BDNF<sup>+/-</sup>)  
439 mice that express ~50% of BDNF protein levels compared to WT littermates (e.g., Endres and  
440 Lessmann, 2012; Psotta et al., 2015). Our results show that both types of low repeat t-LTP remained  
441 functional in response to this chronic depletion of BDNF (6 x 1:1 t-LTP: WT:  $131.37 \pm 9.67$ , BDNF<sup>+/-</sup>:  
442  $134.47 \pm 14.85$ ; Mann-Whitney U test,  $U = 25.0$ ;  $p = 0.7789$ ; and 6 x 1:4 t-LTP: WT:  $134.41 \pm 8.78$ ,  
443 BDNF<sup>+/-</sup>:  $128.11 \pm 8.12$ ; Mann-Whitney U test,  $U = 14.0$ ;  $p = 0.5887$ , **Fig. 7A**). Next, to examine  
444 whether acute inhibition of BDNF/TrkB signaling affects low repeat t-LTP, we asked whether  
445 scavenging of BDNF by bath applied TrkB receptor bodies (human TrkB-Fc chimera, TrkB-Fc) impairs  
446 low repeat canonical or burst t-LTP. However scavenging of BDNF had no effect on the magnitude of  
447 t-LTP induced by either of the two protocols (6 x 1:1 t-LTP: ASCF:  $157.39 \pm 18.19$ , TrkB-Fc:  $173.07 \pm$

448 14.05; Mann-Whitney U test,  $U = 13.0$ ;  $p = 0.0939$  and 6 x 1:4 t-LTP: ACSF:  $159.78 \pm 10.36$ , TrkB-Fc:  
 449  $152.80 \pm 20.28$ ; Mann-Whitney U test,  $U = 22.0$ ;  $p = 0.8048$ , **Fig. 7B**).

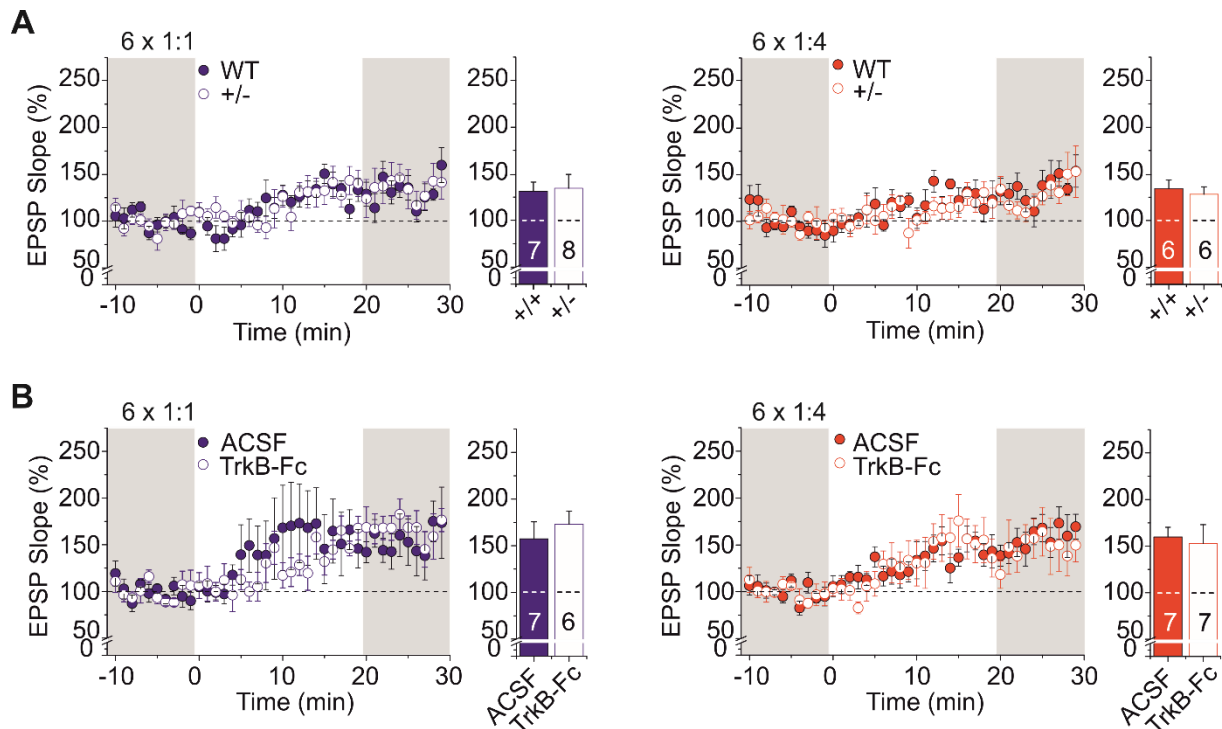

450

451 **Figure 7: BDNF induced TrkB receptor signaling is not required for t-LTP elicited by low repeat t-LTP**  
 452 **protocols. A)** Low repeat t-LTP was not different for 6 x 1:1 (left) and 6 x 1:4 (right) stimulation in  
 453 heterozygous BDNF knockout animals (+/-) compared to wild type litter mates (+/+) (6 x 1:1: +/+ n=7  
 454 / N=6, +/- n=8 / N=7; 6 x 1:4: +/+ n=6 / N=5, +/- n=6 / N=5). **B)** Bath application of the BDNF  
 455 scavenger TrkB-Fc (100 ng/ml; 3h preincubation) did not affect t-LTP in response to the two low  
 456 repeat protocols (left: 6 x 1:1: ACSF n=7 / N=5, TrkB-Fc n=6 / N=6; right: 6 x 1:4: ACSF n=7 / N=5, TrkB-  
 457 Fc n= 7 / N= 6). Average time course of potentiation and mean ( $\pm$  SEM) magnitude of t-LTP are shown  
 458 for the respective experiments.

459

460 Together these data indicate that 6 x 1:4 and 6 x 1:1 t-LTP are both independent from activity-  
 461 dependent release of endogenous BDNF and downstream TrkB signaling. In conjunction with our  
 462 previous observation that 25 x 1:4 t-LTP is dependent on release of endogenous BDNF (compare  
 463 Edelman et al., 2015) the present data suggest that a higher number (>6) of postsynaptic spike  
 464 bursts in the t-LTP protocol is required to activate BDNF secretion.

465

466

467 **The role of GluA2-lacking, calcium-permeable AMPA receptors in low repeat t-LTP**

468 The transient incorporation of GluA2-lacking, Ca<sup>2+</sup> permeable (cp-) AMPARs after LTP induction has  
469 been proposed as an important process to increase postsynaptic Ca<sup>2+</sup> levels for LTP expression (Kauer  
470 and Malenka, 2006; Man, 2011; reviewed in Park et al., 2018; Plant et al., 2006). To examine whether  
471 these receptors are involved in low repeat t-LTP, we incubated our recorded hippocampal slices with  
472 the selective cp-AMPA inhibitor NASPM (100 μM). Interestingly, 6 x 1:1 t-LTP and 6 x 1:4 t-LTP were  
473 both completely blocked in the presence of NASPM (6 x 1:1: ACSF: 142.81 ± 12.11, NASPM: 89.45 ±  
474 9.04; unpaired Student's t-test,  $t_{(14)} = 3.3502$ ;  $p = 0.0048$ ; 6 x 1:4: ACSF: 177.66 ± 16.83, NASPM:  
475 100.32 ± 5.95; unpaired Student's t-test,  $t_{(19)} = 4.829$ ;  $p = 0.0002$ , **Fig. 8A, B**). Surprisingly, these  
476 results indicate that the influx of Ca<sup>2+</sup> via GluA2-lacking, cp-AMPARs is mandatory to elicit low-repeat  
477 t-LTP induction.

478

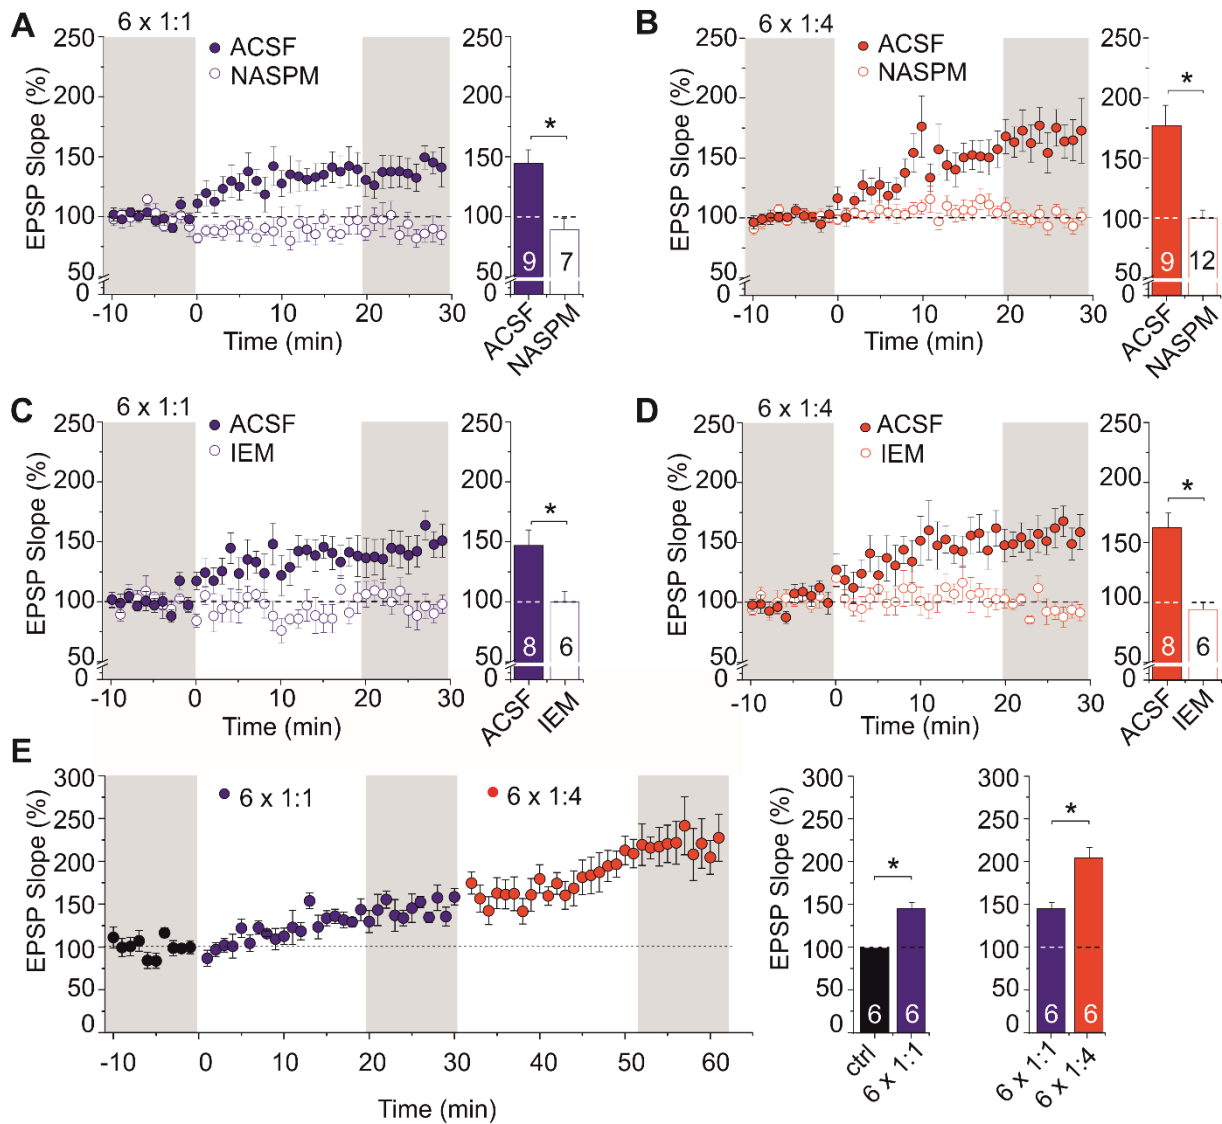

479

480 **Figure 8:  $Ca^{2+}$  influx via GluA2-lacking calcium-permeable AMPARs is required for low-repeat t-LTP**  
 481 **induction.** Bath application of a selective inhibitor of  $Ca^{2+}$  permeable AMPARs (100  $\mu$ M NASPM)  
 482 blocks 6 x 1:1 t-LTP (**A**, 6 x 1:1: ACSF n=9 / N=5, NASPM n=7 / N=3) as well as 6 x 1:4 t-LTP (**B**, 6 x 1:4:  
 483 ACSF n= 9 / N=6 NASPM n=12 / N=5). Also IEM-1460 (100  $\mu$ M), a second specific inhibitor of cp-  
 484 AMPARs, blocks 6 x 1:1 t-LTP (**C**, 6 x 1:1: ACSF n=8 / N=5, IEM-1460 n=6 / N=3) as well as 6 x 1:4 t-LTP  
 485 (**D**, 6 x 1:4: ACSF n= 8 / N=5, IEM n=6 / N=3). **E**) Successful induction of 6 x 1:1 t-LTP and subsequent 6  
 486 x 1:4 t-LTP in the same cells (n=6 / N=3). Note the absence of any signs of occlusion between t-LTP  
 487 induced by the two low repeat protocols (compare **Fig. S2**). Average time course of potentiation and  
 488 mean ( $\pm$  SEM) magnitude of t-LTP are shown for the respective experiments

489

490 To rule out off-target effects of NASPM, we verified cp-AMPA contribution in low repeat t-LTP with  
 491 a second inhibitor of cp-AMPA (IEM-1460, 100  $\mu$ M). As shown in **Figure 8C** and **D**, we observed  
 492 complete inhibition of low repeat t-LTP also by IEM for both protocols (6 x 1:1: ACSF: 146.99  $\pm$  12.56,

493 IEM:  $99.89 \pm 8.43$ ; unpaired Student's t-test,  $t_{(12)} = 2.76256$ ;  $p = 0.0172$ ; 6 x 1:4: ASCF:  $162.03 \pm 12.70$ ,  
494 IEM:  $94.70 \pm 6.24$ ; unpaired Student's t-test,  $t_{(12)} = 4.4567$ ;  $p = 0.0007$ , **Fig. 8C, D**).

495 In light of the many differences in the induction, expression mechanisms, and dopaminergic  
496 modulation of the canonical 6 x 1:1 t-LTP and the 6 x 1:4 burst t-LTP we asked whether both types of  
497 t-LTP can be elicited completely independent from one another or if they occlude each other. To this  
498 aim, we first induced 6 x 1:1 t-LTP followed in the same cells by a subsequently induced 6 x 1:4 t-LTP.  
499 As shown in **figure 8C**, both types of t-LTP could be activated independently without any signs of  
500 occlusion (1<sup>st</sup> t-LTP induction (6 x 1:1,  $143.68 \pm 5.85\%$ ):  $t_{(5)} = -3.4618$ ;  $p = 0.0180$ ; 2<sup>nd</sup> t-LTP- induction (6  
501 x 1:4,  $203.17 \pm 12.04\%$ ):  $t_{(5)} = -4.7081$ ;  $p = 0.0053$ , paired Student's t-test). Importantly, in another set  
502 of cells, subsequent stimulation for a second time with the same 6 x 1:1 protocol that had already  
503 successfully induced t-LTP, did not yield further potentiation (**Fig. S2**; 1<sup>st</sup> t-LTP induction (6 x 1:1,  
504  $147.31 \pm 13.06\%$ ):  $t_{(4)} = -3.4607$ ;  $p = 0.0258$ ; 2<sup>nd</sup> t-LTP- induction (6 x 1:1,  $157.97 \pm 17.88\%$ ):  $t_{(4)} = -$   
505  $1.9649$ ;  $p = 0.1209$ ; paired Student's t-test). Given the strong differences in the induction processes  
506 and the presynaptic expression of 6 x 1:1 vs. postsynaptic expression of 6 x 1:4 t-LTP, the absence of  
507 occlusion between the two protocols was an expected finding. However, this result highlights the  
508 independence of the two different types of low repeat t-LTP investigated here.

509  
510 The scheme presented in **figure 9** summarizes our findings for the presynaptically expressed 6 x 1:1 t-  
511 LTP and the postsynaptically expressed 6 x 1:4 t-LTP and depicts the putative roles of mGluRs, cp-  
512 AMPARs, dopamine signaling, and internal  $Ca^{2+}$  stores in low repeat t-LTP. However, since the  
513 distribution of dopaminergic fibers and the pre- and/or postsynaptic dopamine receptor localization  
514 in the CA1 region is not yet completely clear (compare Edelman and Lessmann, 2018), further  
515 experiments are clearly required to improve the mechanistic understanding of this aspect of low  
516 repeat t-LTP. None withstanding, both low repeat t-LTP forms are already by now clearly  
517 distinguishable. Their different features of induction and expression mechanisms and the distinct  
518 signaling cascades they employ, are likely to form the basis for the versatile computing capacity of  
519 individual CA1 neurons in the hippocampus.



520

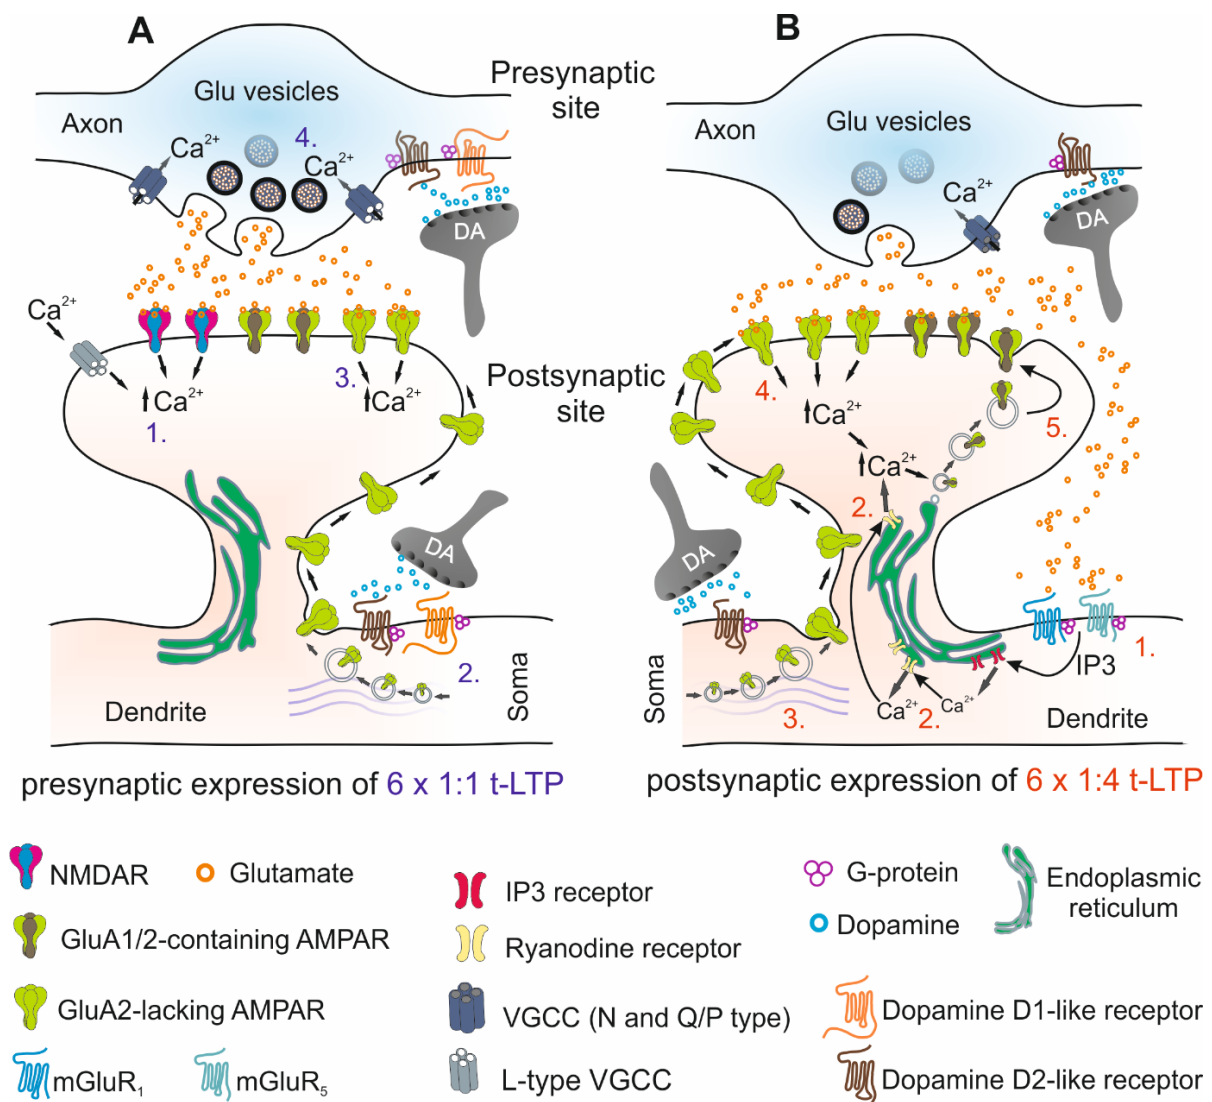

521

522 **Figure 9: Suggested cellular signaling mechanisms involved in low repeat t-LTP at Schaffer**  
 523 **collateral-CA1 synapses.** Summary of induction, signaling, and expression mechanisms involved in  
 524 low repeat canonical (i.e. 6 x 1:1 t-LTP) and burst (i.e. 6 x 1:4) t-LTP protocols in CA1 pyramidal  
 525 neurons. **A)** Synaptic mechanisms involved in the presynaptically expressed 6 x 1:1 t-LTP. T-LTP  
 526 induction depends on postsynaptic NMDAR and L-type VGCC mediated Ca<sup>2+</sup> influx (1.). Insertion of cp-  
 527 AMPARs into the postsynaptic membrane might be regulated by D1/D2 signaling (2.) and could  
 528 account for the combined D1/D2 receptor dependence of 6 x 1:1 t-LTP. Ongoing low frequency test  
 529 stimulation after induction of t-LTP leads to sustained Ca<sup>2+</sup> elevations through postsynaptic cp-  
 530 AMPARs (3.). The resulting prolonged postsynaptic Ca<sup>2+</sup> elevation leads via a yet unidentified  
 531 retrograde messenger to increased presynaptic efficacy (4.). An additional presynaptic contribution of  
 532 D1/D2 signaling to enhanced presynaptic glutamatergic function is possible. **B)** The postsynaptically  
 533 expressed 6 x 1:4 t-LTP does neither require postsynaptic NMDAR nor L-type VGCC activation for  
 534 induction. It rather depends on calcium release from postsynaptic internal stores mediated by



535 *mGluR<sub>1,5</sub>-dependent activation of IP3 receptors in the ER (1.). This initial postsynaptic Ca<sup>2+</sup> rise is*  
536 *amplified by Ca<sup>2+</sup> dependent Ca<sup>2+</sup> release via Ryanodine receptors (RyRs; 2.). Moreover, the 6 x 1:4 t-*  
537 *LTP depends (like 6 x 1:1 t-LTP) on the activation of cp-AMPA receptors. Intact D2 receptor signaling is*  
538 *mandatory to observe 6 x 1:4 t-LTP and might be involved in recruiting cp-AMPA receptors to the*  
539 *postsynaptic membrane (3.) for sustained Ca<sup>2+</sup> influx during ongoing low frequency synaptic*  
540 *stimulation after t-LTP induction (4.). The resulting prolonged postsynaptic Ca<sup>2+</sup> elevation initiated by*  
541 *mGluRs, RyRs, and cp-AMPA receptors leads to postsynaptic expression of 6 x 1:4 t-LTP by insertion of new*  
542 *GluA1 and GluA2-containing AMPA receptors into the postsynaptic membrane (5.)*

543

544

545

546 **Discussion**

547

548 Our study shows that t-LTP at hippocampal SC-CA1 synapses requires only six repeats of coincident  
549 presynaptic stimulation paired with either 1 or 4 postsynaptic spikes at low frequency (0.5 Hz). For  
550 the 1:4 burst protocol, even just three repeats are sufficient to elicit t-LTP. The 6 x 1:1 t-LTP was  
551 induced by Ca<sup>2+</sup> influx via postsynaptic NMDARs and L-type VGCCs, occurred independent of BDNF  
552 release, and required combined D1/D2 receptor signaling. In contrast, the 6 x 1:4 t-LTP was induced  
553 by postsynaptic Ca<sup>2+</sup> release from internal stores mediated via mGluRs/IP<sub>3</sub> signaling and ryanodine  
554 receptors, and was completely inhibited in the presence of D2 receptor antagonists. Both, low repeat  
555 canonical and burst t-LTP, strongly depended on activation of GluA2-lacking cp-AMPA receptors. These data  
556 suggest that low repeat STDP paradigms with potentially high physiological relevance can induce  
557 equally robust t-LTP as observed for high repeat t-LTP in the hippocampus. However, the  
558 pharmacological profile of low repeat t-LTP induction and expression revealed astonishingly subtle  
559 differences between both induction protocols.

560

561 **Dependence of t-LTP on repeat number and frequency of the STDP stimulation**

562 Both 6 x t-LTP protocols used in our study yielded robust t-LTP with similar time courses as described  
563 previously for standard STDP paradigms that used either higher number of pairings or higher pairing  
564 frequency (compare e.g., Carlisle et al., 2008; Couey et al., 2007; Edelman et al., 2015; Seol et al.,  
565 2007; Tigaret et al., 2016; Wittenberg and Wang, 2006; Yang and Dani, 2014). To date, only few  
566 studies focused on STDP protocols with low numbers of repeats for t-LTP induction (Cui et al., 2016;  
567 discussed in Edelman et al., 2017; Froemke et al., 2006; Zhang et al., 2009). Since only such low  
568 repeat t-LTP protocols can be completed within a few seconds, these protocols are likely to represent  
569 a very physiological model for synaptic plasticity events triggering learning and memory processes  
570 that can also occur on a timescale of seconds. Thus, investigating the underlying signaling  
571 mechanisms appears to be relevant for learning induced synaptic changes *in vivo*. Similar to the  
572 results of Froemke and colleagues (Froemke et al., 2006) for layer 2/3 cortical neurons, we observed

573 no significant difference in the magnitude of 1:1 t-LTP between the threshold repeat number (i.e., 6  
574 repeats at 0.5 Hz) and higher repeat numbers at hippocampal Schaffer collateral (SC)–CA1 synapses  
575 (25 and 70 repeats; compare **Fig. 1A**). As for the canonical protocol, we also determined the  
576 threshold for successful t-LTP induction also for the burst protocol (compare **Fig. 1B**). The observed  
577 shift of the threshold repeat number to lower values (3 instead of 6 repeats for successful 1:4 t-LTP  
578 induction) for the burst protocol speaks in favor of facilitated postsynaptic induction by the spike  
579 train instead of single spikes used by the 1:1 protocol (compare Remy and Spruston, 2007). Although  
580 35 repeats of the burst protocol showed a tendency towards reduced magnitude of t-LTP, the  
581 efficacy of 3, 6 and 35 repeats of 1:4 t-LTP were not significantly different. Together these data  
582 suggest that depending on the exact pattern (e.g., 1:1 vs. 1:4 paradigm) used for t-LTP induction  
583 distinct thresholds for the successful number of repeats can be observed.

584 Bittner and colleagues recently described in elegant *in vivo* recordings synaptic plasticity in mouse  
585 hippocampal place cells that can be triggered by pairing low numbers of postsynaptic action  
586 potentials with long-lasting dendritic depolarization, which works equally well with positive and  
587 negative pairing delays of roughly 1 s (Bittner et al., 2015; Bittner et al., 2017). While their work  
588 provides compelling evidence for the physiological relevance of low repeat spiking induced LTP for  
589 learning, this behavioral time scale synaptic plasticity follows a non-hebbian mechanism. In contrast,  
590 our low repeat t-LTP follows hebbian rules, since only simultaneous and nearly coincident pre- and  
591 postsynaptic pairing with positive timing delays leads to associative potentiation (compare **Fig. 2C**).  
592 Nevertheless, also such hebbian t-LTP protocols have been described previously to allow extension of  
593 STDP to behavioral time scales (compare e.g., Drew and Abbott, 2006; Gerstner et al., 2018; Shindou  
594 et al., 2019). In case of our low repeat t-LTP protocols, with the six repeat protocol comprising overall  
595 10 s, and the three repeat protocol occurring within overall 4 s, this duration might bridge the time  
596 window between millisecond-dependent STDP and learned behavior on the time scale of several  
597 seconds.

598

599 In cultured hippocampal neurons, Zhang and colleagues (Zhang et al., 2009) showed that more than  
600 10 repeats of their 1:1 STDP protocol were necessary to induce t-LTP. However, bath application of  
601 dopamine facilitated t-LTP induction and reduced the number of pairings that were required at a  
602 given frequency to successfully induce t-LTP (Zhang et al., 2009). Since primary cultures of  
603 dissociated hippocampal neurons develop synaptic connections in the absence of dopaminergic  
604 inputs, the role of endogenous DA can be investigated only if t-LTP is recorded in acutely isolated  
605 hippocampal slices as performed here. Interestingly, our data show that both low repeat t-LTP  
606 variants tested are blocked when signaling of endogenously released DA is inhibited (**Fig. 6**). Our  
607 results are in line with the previously described effects of exogenously added DA on t-LTP in  
608 hippocampal cultures (Zhang et al., 2009). The release of endogenous DA in our slices (Edelmann and  
609 Lessmann, 2011, 2013) is therefore likely to account for the low number of repeats required for  
610 successful induction of t-LTP in our study. Whether this effect is due to acute release of DA from axon  
611 terminals elicited via the extracellular co-stimulation of dopaminergic afferents during t-LTP  
612 induction and test stimulation or rather depends on ambient levels of DA in the slices remains to be  
613 determined.

614 Regarding the magnitude of t-LTP induced by low repeat canonical and burst protocols we, found  
615 that both, 6 x 1:1 and 6 x 1:4 t-LTP, were equally successful to induce t-LTP at positive spike timings  
616 (**Fig. 2C**). Because it is reasonable to assume that 1:4 burst protocols induce longer lasting and  
617 stronger  $\text{Ca}^{2+}$  elevations than 1:1 pairings, it might be expected that the time course of synaptic  
618 potentiation could differ between the two protocols. However, both protocols induced t-LTP with  
619 comparable onsets and rise times of potentiation and also resulted in similar magnitudes of t-LTP  
620 after 1 h of recording (compare **Fig. 2D**). Thus, except for the lower threshold number of repeats to  
621 elicit t-LTP (see last paragraph), the burst protocol does not seem to be more effective in inducing t-  
622 LTP at SC-CA1 synapses than the canonical protocol.

623 We also compared different spike timings (with negative and positive delays), to compare the full  
624 capacity to induce bidirectional plasticity with low repeat protocols (**Fig. 2A, B**). For positive pairings  
625 with  $\Delta t$ : +20 ms we observed a similar decline (compared to  $\Delta t$ : +10 ms) in t-LTP magnitude as

626 described previously for higher numbers of repeats (compare Bi and Poo, 1998; Edelman et al.,  
627 2015). When applying negative pairings (i.e. post before pre pairings) t-LTP was absent, but we did  
628 not observe robust t-LTD for either of the two protocols. While these results stress that successful  
629 induction of t-LTP is critically dependent on the sequence of presynaptic and postsynaptic spiking  
630 and on the pairing interval, future studies should address under which conditions low repeat t-LTD  
631 can be induced by anti-causal synaptic activation.

632

### 633 **Mechanisms of expression of low repeat t-LTP**

634 Despite the similarities described above, both low repeat protocols recruited different expression  
635 mechanisms. Synaptic potentiation induced with the 6 x 1:1 protocol is most likely expressed by  
636 presynaptic alterations (see below), whereas the 6 x 1:4 protocol relies on postsynaptic insertion of  
637 AMPA receptors (**Fig. 3**). Commonly, LTP at SC-CA1 synapses that is induced by high-frequency  
638 stimulation and is also thought to be expressed by a postsynaptic increase in AMPA receptor  
639 mediated currents (Granger and Nicoll, 2014; Nicoll, 2003). For STDP, however, different mechanisms  
640 of expression have been described that varied between brain regions and depending on  
641 experimental conditions (see e.g., Costa et al., 2017). Even at a given type of synapse (i.e.  
642 hippocampal SC-CA1) t-LTP can be expressed either pre- or postsynaptically (Edelman et al., 2015).  
643 At this synapse, the expression mechanism of LTP seemed to be encoded by the pairing pattern used  
644 for STDP. While t-LTP induced by 70 x 1:1 stimulation was expressed via increased presynaptic  
645 glutamate release, a 35 x 1:4 t-LTP was expressed via insertion of additional AMPARs by a GluA1-  
646 dependent mechanism (Edelman et al., 2015). However, in this previous study, we used different  
647 numbers of repeats for the two t-LTP protocols (i.e. 20-35 x 1:4 and 70-100 x 1:1) to keep  
648 postsynaptic activity at an equivalent level. Those previous results did not allow to distinguish  
649 whether repeat number or stimulation pattern determined the site of t-LTP expression. With help of  
650 our current experiments using fixed numbers of repeats for both protocols, we could now determine  
651 that the pattern of postsynaptic spiking and not the repeat number influences the expression locus  
652 for t-LTP (compare **Fig. 3**).

653

654 For the 6 x 1:1 t-LTP, the absence of an increase in AMPAR mediated currents (**Fig. 5**) and the  
655 observed decrease in paired pulse ratio (PPR) after successful LTP induction and the increased mEPSC  
656 frequency (**Fig. S1**), are consistent with presynaptic enhancement of glutamate release probability.  
657 Regarding the retrograde messenger required for both types of 1:1 t-LTP our data indicate that  
658 neither NO nor endocannabinoids are involved in the presynaptic expression (data not shown).  
659 However, further investigating the underlying presynaptic mechanisms of 6 x 1:1 t-LTP was beyond  
660 the scope of the current study. The six repeat version of our burst t-LTP protocol (6 x 1:4) seems to  
661 follow the suggested mechanisms for conventional SC-CA1 LTP, with postsynaptic expression via  
662 insertion of new AMPARs leading to increased AMPAR mediated currents and the absence of  
663 significant changes in paired pulse facilitation, as previously also described for high repeat burst t-LTP  
664 (Edelmann et al., 2015). Furthermore, our experiments with Pep1-TGL clearly demonstrate the  
665 importance of GluA1 containing AMPARs for the expression of 6 x 1:4 t-LTP (**Fig. 3C**).

666

#### 667 **Dependence of low repeat t-LTP induction on different sources for postsynaptic Ca<sup>2+</sup> elevation**

668 Induction of t-LTP with low repeat STDP protocols as a model to investigate physiologically relevant  
669 synaptic plasticity mechanisms has just started. Accordingly, the contribution of different sources of  
670 Ca<sup>2+</sup> to its induction was until now largely unknown. Unexpectedly, our experiments revealed  
671 distinctly different routes for postsynaptic Ca<sup>2+</sup> elevation for the low repeat 1:1 and 1:4 protocol to  
672 induce t-LTP. The results for the 6 x 1:1 t-LTP are in accordance with previous studies showing that t-  
673 LTP as well as classical high frequency stimulation induced LTP at CA1 glutamatergic synapses rely on  
674 Ca<sup>2+</sup> influx via postsynaptic NMDA receptors (Malenka and Bear, 2004). For STDP, NMDARs are  
675 thought to serve as coincidence detectors of timed pre- and postsynaptic activation (e.g., Bi and Poo,  
676 1998; Debanne et al., 1998; Edelmann et al., 2015; Feldman, 2000). Depending on the level of  
677 postsynaptic Ca<sup>2+</sup> that is reached during induction, separate signaling cascades leading to either LTP  
678 or LTD are activated (Artola and Singer, 1993; cited in Caporale and Dan, 2008; Lisman, 1989). For t-  
679 LTD, alternative mechanisms for coincidence detection have been described (Bender et al., 2006;

680 Fino and Venance, 2010). Instead of NMDAR-mediated  $\text{Ca}^{2+}$  influx, these studies reported that either  
681 mGluRs, L-type VGCCs or IP3 gated internal  $\text{Ca}^{2+}$  stores can trigger the induction of LTD. As for LTD,  
682 also for LTP, additional coincidence detectors and  $\text{Ca}^{2+}$  sources might be involved in its induction  
683 (Dudman et al., 2007; VGCC: Magee and Johnston, 1997; Nanou et al., 2016; IP3-sensitive stores:  
684 Takechi et al., 1998; Wang et al., 2016; Wiera et al., 2017). In accordance with these previous studies,  
685 we found that 6 x 1:1 t-LTP can in addition to NMDARs also be induced by  $\text{Ca}^{2+}$  entry through L-type  
686 VGCCs (**Fig. 4A, C**).

687 In contrast to these conventional  $\text{Ca}^{2+}$  sources for the canonical low repeat t-LTP, the situation is  
688 much different for 6 x 1:4 burst t-LTP. Although a requirement for postsynaptic  $\text{Ca}^{2+}$  elevation is  
689 clearly evident from the BAPTA experiments (**Fig. 5A**),  $\text{Ca}^{2+}$  entry via NMDARs or L-type VGCCs was  
690 not involved (compare **Fig. 4B, D**). Rather, our results demonstrated that the initial postsynaptic  $\text{Ca}^{2+}$   
691 rise involved group I mGluRs (i.e. mGluR<sub>1</sub> and mGluR<sub>5</sub>; Kaar and Rae, 2015), subsequent activation of  
692 IP<sub>3</sub>Rs and RyRs, eventually activating GluA2-lacking  $\text{Ca}^{2+}$ -permeable AMPARs in the postsynaptic  
693 membrane (compare **Figs. 5 and 8**). While activation of mGluRs seems to contribute to the initial  
694 postsynaptic  $\text{Ca}^{2+}$  rise in 6 x 1:4 t-LTP, subsequent  $\text{Ca}^{2+}$  induced  $\text{Ca}^{2+}$  release via RyRs amplifies and  
695 prolongs this  $\text{Ca}^{2+}$  signal (compare **Fig. 5D**). The initial rise in postsynaptic  $\text{Ca}^{2+}$  levels might be co-  
696 induced by  $\text{Ca}^{2+}$  influx through GluA2 subunit deficient  $\text{Ca}^{2+}$ -permeable AMPA receptors (cp-AMPARs)  
697 into the postsynaptic cell (Suzuki et al., 2001) . This is evident from our experiments performed in the  
698 presence of the mGluR antagonists, IP<sub>3</sub>R inhibitors and the antagonists of  $\text{Ca}^{2+}$  permeable AMPARs  
699 NASPM and IEM, which completely inhibited 6 x 1:4 t-LTP (group I mGluR: **Fig. 5B, C**, cp-AMPAR: **Fig.**  
700 **8B, D**, for discussion of cp-AMPAR, see below).

701 Group I metabotropic GluR have indeed been described previously to contribute to certain types of  
702 hippocampal LTP (Wang et al., 2016), while our present results show for the first time their  
703 involvement in STDP. Altogether it seems plausible that 6 x 1:4 stimulation first activates mGluR<sub>1,5</sub>  
704 receptors, which subsequently trigger IP<sub>3</sub>- mediated calcium release from internal stores (Jong et al.,  
705 2014, compare **Fig. 5D**). The resulting calcium rise and additional  $\text{Ca}^{2+}$  influx via cp-AMPARs might

706 than be strengthened by additional IP<sub>3</sub> and RyR mediated calcium induced Ca<sup>2+</sup> release to  
707 successfully boost low repeat induced burst t-LTP (compare **Fig. 9**).

708

### 709 **Regulation of low repeat t-LTP by dopamine receptor signaling**

710 The accurate timing of pre- and postsynaptic activity is necessary for hebbian plasticity. In addition,  
711 neuromodulator signaling critically regulates the efficacy of STDP protocols to elicit t-LTP (e.g.,  
712 Cassenaer and Laurent, 2012; Cui et al., 2015; Edelman et al., 2015; Edelman et al., 2017;  
713 Edelman and Lessmann, 2011, 2018; Pawlak and Kerr, 2008; Seol et al., 2007; Yang and Dani, 2014;  
714 Zhang et al., 2009). Since high repeat STDP in the hippocampus is regulated by dopamine (DA, e.g.,  
715 Edelman and Lessmann, 2013), we also investigated DAergic modulation of our two low repeat  
716 STDP variants (compare **Fig. 6**). While both low repeat t-LTP protocols were dependent on  
717 endogenous DA signaling, the pharmacological profile for them was quite different. The 6 x 1:4 t-LTP  
718 was completely dependent on intact D2 receptor signaling, but independent from D1 receptor  
719 activation. This result can be easily reconciled with pure D2 receptor dependent signaling being  
720 responsible for induction of the 6 x 1:4 t-LTP (compare **Fig. 6B**). Little is known about D2R mediated  
721 function in t-LTP as well as in classical LTP. It was shown, however, that D2 receptors can limit  
722 feedforward inhibition in the prefrontal cortex and allow thereby more effective t-LTP (Xu and Yao,  
723 2010). Importantly, D2 like receptors are expressed in the hippocampus in pre- and postsynaptic  
724 neurons and have been described to regulate synaptic plasticity (Beaulieu and Gainetdinov, 2011;  
725 Dubovyk and Manahan-Vaughan, 2019; Sokoloff et al., 2006). Moreover, D2 receptors contribute to  
726 hippocampus-dependent cognitive functions (Nyberg et al., 2016). Together, these previous results  
727 on D2 receptor mediated functions in the hippocampus are clearly in line with the role in 6 x 1:4 t-  
728 LTP in our experiments. In contrast to the 6 repeat burst protocol, the 6 x 1:1 t-LTP remained  
729 functional when either D1-like or D2-like dopamine receptor signaling was intact. Although inhibition  
730 of D2 receptors by Sulpiride had a tendency to reduce the magnitude of the 1:1 t-LTP, this effect did  
731 not reach statistical significance. Moreover, while the D1 receptor inhibitor SCH23390 alone did not  
732 show any signs of 6 x 1:1 t-LTP inhibition, it was nevertheless able to impair the slightly reduced t-LTP



733 in the presence of Sulpiride down to control levels, when both antagonists were co-applied (**Fig. 6A**).

734 The interpretation of this pharmacological profile of 6 x 1:1 t-LTP needs to take into consideration

735 that D1-like and D2-like receptors do not signal exclusively via altering cAMP levels (cAMP increase

736 via D1-like receptors - or decreased via D2-like receptors; Tritsch and Sabatini, 2012). Rather, D5

737 receptors and heterodimeric D1/D2 receptors can also activate cAMP-independent PLC pathways

738 stimulating in turn  $IP_3/Ca^{2+}$ , DAG/PKC signaling, or MAPK signaling downstream of D1 receptor

739 activation and Akt kinase signaling. Also direct modulation of NMDARs and VGCCs in response to D2R

740 activation is possible (Beaulieu and Gainetdinov, 2011). Consequently, the question whether the

741 combined D1 -like/D2 -like receptor dependence of the 1:1 t-LTP reflects rather the activation of

742 D1/D2 heteromeric receptors, or distinct pre- vs. postsynaptic expression and signaling of D1 and D2

743 receptors at SC-CA1 synapses needs to be addressed by future experiments.

744 To interpret the combined regulation of the 6 x 1:1 t-LTP by D1- and D2-like receptors it also needs to

745 be taken into consideration that D2-like receptors are generally believed to display a higher affinity

746 for DA compared to D1-like receptors (Beaulieu and Gainetdinov, 2011). Therefore, the complex D1-

747 and D2 receptor-dependent regulation of 6 x 1:1 t-LTP might assure that this type of t-LTP is on the

748 one hand regulated by the presence of DA, but on the other hand remains intact at high and low DA

749 concentrations. On the same vein, this co-regulation could assure that slowly rising ambient DA

750 levels created by tonic firing of DAergic neurons are equally effective in regulating 6 x 1:1 t-LTP as

751 much faster rising DA concentrations during phasic firing.

752 Such a change in DA release was indeed shown in recordings of midbrain neurons, where activity of

753 DAergic neurons switches from tonic to phasic burst activity resulting in locally distinct levels of

754 secreted DA in the target regions (Rosen et al., 2015). Local DA concentration differences can then

755 result in different DA-dependent effects, with high affinity D2-like receptors being activated by low

756 and slowly rising extracellular DA levels, while low affinity D1 receptors are only activated by local DA

757 peaks.

758 For our STDP experiments where DAergic input fibers are most likely co-activated during SC

759 stimulation, we observed similar activity-dependent recruitment of different DA receptors. While D1

760 receptor-dependent effects were activated by 70-100 stimulations (Edelmann and Lessmann, 2011  
761 and compare **Fig. 6C**), D1/D2 receptors or pure D2 receptor mediated processes were already  
762 activated by six presynaptic co-stimulations of DAergic fibers (compare **Fig. 6A, B**). Taking into  
763 account that D2-like receptors (i.e. D2, D3 and D4 receptors) are classically thought to inhibit LTP by  
764 decreasing cAMP/PKA signaling (Otmakhov and Lisman, 2002; Otmakhova et al., 2000), D2-like  
765 receptor driven t-LTP processes might indeed be activated by  $G_{\beta\gamma}$  signaling independent of cAMP  
766 pathways. As mentioned above,  $G_{\beta\gamma}$  signaling also blocks L-type and N-type VGCCs (Tritsch and  
767 Sabatini, 2012) and D2 receptor signaling can yield  $Ca^{2+}$  release from internal stores - two  
768 mechanisms that might account for the uncommon type of calcium source required for the induction  
769 of our 6 x 1:4 t-LTP (compare **Figs. 4 and 5**).

770

#### 771 **Independence of low repeat t-LTP on BDNF/TrkB signaling**

772 Brain-derived neurotrophic factor (BDNF) is well known for its important role in mediating long-  
773 lasting changes of synaptic plasticity (reviewed in e.g., Edelmann et al., 2014; Gottmann et al., 2009;  
774 Lessmann et al., 2003; Park and Poo, 2013). Moreover, BDNF is also involved in regulating STDP  
775 (Edelmann et al., 2015; Lu et al., 2014; Sivakumaran et al., 2009). For hippocampal SC-CA1 synapses it  
776 was shown that BDNF is secreted from postsynaptic CA1 neurons in response to 20-35 repeats of a  
777 1:4 STDP protocol mediating postsynaptically expressed t-LTP via postsynaptic TrkB receptor  
778 activation (Edelmann et al., 2015). Interestingly, the results of the present study revealed, that  
779 neither of the two low repeat t-LTP variants depended on BDNF induced TrkB signaling (compare **Fig.**  
780 **7**). This finding was not unexpected since release of endogenous BDNF has been reported previously  
781 to require more prolonged barrages of AP firing than just 6 repeats of short AP (burst) firing at 0.5 Hz  
782 (compare Balkowiec and Katz, 2002; Edelmann et al., 2015; Lu et al., 2014; Brigadski et al., 2019).  
783 This BDNF independency was observed in situations with either chronic (e.g., heterozygous BDNF  
784 knockout animals) or acute depletion of BDNF (BDNF scavenger; see e.g., Edelmann et al., 2015; Meis  
785 et al., 2012; Schildt et al., 2013).

786

787 **Function of GluA2-lacking Ca<sup>2+</sup> permeable AMPA receptors in low repeat t-LTP**

788 Interestingly, both variants of low repeat t-LTP were strictly dependent on activation of GluA2-lacking  
789 calcium-permeable (cp-)AMPA receptors (**Fig. 8**). In the respective experiments, NASPM or IEM were  
790 present in the ACSF from the start of the recording to assure complete inhibition of cp-AMPA receptors  
791 during t-LTP induction. The respective solvent controls were treated in the same way. In CA1  
792 neurons, cp-AMPA receptors were described to be absent from postsynaptic membranes during basal  
793 synaptic stimulation. Rather, they were reported to transiently insert into the postsynaptic  
794 membrane after tetanic LTP stimulation to allow sustained Ca<sup>2+</sup> influx into the postsynaptic neuron  
795 after LTP induction, thereby facilitating expression of late LTP (reviewed in Park et al., 2018). A role of  
796 cp-AMPA receptors in STDP has thus far not been reported and these results represent a crucial new finding  
797 that emerges from our study. Additional experiments will be required to determine the time course  
798 of activity-dependent cp-AMPA receptor incorporation during induction of low repeat t-LTP into the  
799 postsynaptic membrane. Furthermore, it needs to be determined how cp-AMPA receptor mediated Ca<sup>2+</sup>  
800 influx is orchestrated with mGluR- and RyR-dependent Ca<sup>2+</sup> elevation for induction of low repeat 6 x  
801 1:4 t-LTP. Likewise, the co-operation of cp-AMPA receptors with NMDAR- and VGCC-dependent Ca<sup>2+</sup>  
802 elevations for inducing 6 x 1:1 t-LTP needs to be investigated.

803 In addition to allowing sufficient Ca<sup>2+</sup> elevation in t-LTP, cp-AMPA receptors might be involved in DA-  
804 dependent priming of synapses for delayed/retroactive reinforcement of LTP or silent eligibility  
805 traces (e.g., Brzosko et al., 2015; Gerstner et al., 2018; He et al., 2015; Shindou et al., 2019). By those  
806 eligibility traces or delayed reinforcements, the different time scales between milliseconds and  
807 seconds can be bridged, to connect hebbian synaptic plasticity to behavioral responses and learning.  
808 Such mechanisms might also be involved in the signaling mechanisms employed by our low repeat t-  
809 LTP protocols (6 x 1:1 and 6 x 1:4), since both variants of t-LTP show a clear dependence on DA  
810 signaling and on cp-AMPA receptors (compare **Figs 6 and 8**).

811

812 In summary, we used two different low repeat STDP protocols at SC-CA1 synapses to record synaptic  
813 plasticity at the single cell level in postsynaptic CA1 neurons (i.e. t-LTP). We found that, dependent

814 on stimulation pattern and repeat number, distinct signaling and expression mechanisms are  
815 activated by the canonical and the burst low repeat paradigm. From our experiments, we can  
816 conclude that even with the same experimental setup, age and species, multiple types of synaptic  
817 plasticity mechanisms can coexist at a given type of synapse. This plethora of coexisting plasticity  
818 mechanisms for strengthening synaptic transmission seems to be ideally suited to empower the  
819 hippocampus to fulfill its multiplexed functions in memory storage.

820

## 821 **Material and Methods**

822

### 823 **Preparation of hippocampal slices**

824 Horizontal hippocampal slices (350  $\mu\text{m}$  thickness) were prepared from 4 weeks old male wild type  
825 C57BL/6J (Charles River), BDNF<sup>+/-</sup> or littermate control mice (Korte et al., 1995; all animals bred on a  
826 C57BL/6J background), according to the ethical guidelines for the use of animal in experiments, and  
827 were carried out in accordance with the European Committee Council Directive (2010/63/EU) and  
828 approved by the local animal care committee (Landesverwaltungsamt Sachsen-Anhalt).

829 Briefly, mice were decapitated under deep anesthesia with forene (Isofluran CP, cp-pharma,  
830 Germany) and the brain was rapidly dissected and transferred into ice-cold artificial cerebrospinal  
831 fluid (ACSF) cutting solution (125 mM NaCl, 2.5 mM KCl, 0.8 mM NaH<sub>2</sub>PO<sub>4</sub>, 25 mM NaHCO<sub>3</sub>, 25 mM  
832 Glucose, 6 mM MgCl<sub>2</sub>, 1 mM CaCl<sub>2</sub>; pH 7.4; 300-303 mOsmol/kg), saturated with 95% O<sub>2</sub> and 5% CO<sub>2</sub>.  
833 Blocks from both hemispheres containing the hippocampus and the entorhinal cortex were sectioned  
834 with a vibratome (VT 1200 S, Leica, Germany). Slices were incubated for 35 min at 32°C in a  
835 handmade interface chamber containing carboxygenated ACSF cutting solution and then transferred  
836 to room temperature (~21°C) for at least 1 hour before the recording started. Whole cell patch-clamp  
837 recordings were performed in submerged slices in a recording chamber with continuous perfusion (1-  
838 2 ml per min) of pre-warmed (30  $\pm$  0.2°C) carboxygenated physiological ACSF solution (125 mM NaCl,  
839 2.5 mM KCl, 0.8 mM NaH<sub>2</sub>PO<sub>4</sub>, 25 mM NaHCO<sub>3</sub>, 25 mM Glucose, 1 mM MgCl<sub>2</sub>, 2 mM CaCl<sub>2</sub>; pH 7.4;  
840 300-303 mOsmol/kg). For all experiments, 100  $\mu\text{M}$  Picrotoxin (GABA<sub>A</sub> blocker) was added to ACSF

841 solution. Epileptiform activity by activation of recurrent CA3 synapses was prevented by a cut  
842 between CA3 and CA1 subfields (compare Edelman et al., 2015). To reduce the amount of inhibitors  
843 in some of the experiments (e.g. application of NASPM and IEM-1460) we used a micro-perfusion  
844 pump-driven solution recycling system (Bioptechs Delta T Micro-Perfusion pump high flow,  
845 ChromaPhor, Germany) to limit the volume of solution for incubation of slices (Meis et al., 2012).  
846 Both, NASPM and IEM were applied 15 min prior to STDP induction. The drugs were present during  
847 the whole experiment. Respective matched control experiments were performed under identical  
848 conditions to assure that the microperfusion recycling of ACSF alone did not affect t-LTP.

849

### 850 **Electrophysiological recordings**

851 Whole cell patch-clamp recordings were performed on pyramidal neurons in the CA1 subregion of  
852 the intermediate hippocampus under visual control with infrared DIC-videomicroscopy (RT-SE series;  
853 Diagnostic instruments, Michigan, USA). The pipettes (resistance 5-7 M $\Omega$ ) were filled with internal  
854 solution containing (in mM): 10 HEPES, 20 KCl, 115 potassium gluconate, 0-0.00075 CaCl<sub>2</sub>, 10 Na  
855 phosphocreatine, 0.3 Na-GTP, and 4 Mg-ATP (pH 7.4, 285-290 mOsmol/kg). Cells were held at -70 mV  
856 in current clamp or voltage clamp (liquid junction potential of +10 mV of internal solution was  
857 corrected manually) with an EPC-8 patch clamp amplifier (HEKA, Lamprecht, Germany). Extracellular  
858 stimulation of the Schaffer collateral (SC) fibers to generate an excitatory postsynaptic potential  
859 (EPSP, at 0.05Hz) was induced either by glass stimulation electrodes (resistance 0.7 – 0.9 M $\Omega$ ) or a  
860 concentric bipolar electrode (FHC; Bowdoin, USA) positioned in Stratum radiatum (SR) of the CA1  
861 subregion. The stimulus intensity was adjusted to evoke responses with amplitudes of 4-5 mV  
862 corresponding to 30-50% of maximal EPSP amplitudes. Stimulus duration was set to 0.7 ms with  
863 intensities ranging between 90 to 700  $\mu$ A.

864

### 865 **Induction of Spike timing-dependent plasticity**

866 Spike timing-dependent plasticity (STDP) was induced by pairing of an individual EPSP, generated by  
867 extracellular stimulation of SC, with a single action potential (AP) or with a burst of 4 APs (frequency

868 200 Hz) induced by somatic current injection (2 ms; 1 nA) through the recording electrode (Edelmann  
869 et al., 2015). Pairings of postsynaptic EPSP and APs were usually performed with a time interval of  
870 +10 ms, and were repeated 2-70 times at a frequency of 0.5 Hz to elicit t-LTP. In some experiments,  
871 either longer time windows (positive spike timings:  $\Delta t = +17-25$  ms, binned as 20 ms data) were used  
872 to test t-LTP at longer  $\Delta t$  or short negative spike timings ( $\Delta t = -15$ ms) were used to test effects of anti-  
873 causal synaptic stimulation. EPSPs were monitored every 20 s (i.e., 0.05 Hz) for 10 min baseline and  
874 then 30 min or 60 min after STDP induction. Unpaired stimulation of 4 postsynaptic APs instead of a  
875 full STDP protocol were performed (i.e., 6x 0:4) in a subset of cells that served as controls. In another  
876 set of cells, we assessed possible spontaneous changes in synaptic transmission (stimulation at 0.05  
877 Hz for 40 min) in the absence of any STDP stimulation. These recordings served as negative controls  
878 (designated 0:0 controls).

879 To investigate whether a rise of postsynaptic  $Ca^{2+}$  concentration is required for induction of t-LTP  
880 under our conditions, we applied the  $Ca^{2+}$  chelator BAPTA (10 mM, Sigma, Germany) via the patch  
881 pipette solution into the recorded postsynaptic neuron. NMDA receptor (R) dependency was tested  
882 by application of an NMDAR antagonist (APV 50  $\mu$ M, DL-2-Amino-5-phosphonopentanoic acid, Tocris,  
883 Germany) in the bath solution. The contribution of L-type voltage gated  $Ca^{2+}$  channel activation to t-  
884 LTP was evaluated with bath applied Nifedipine (25  $\mu$ M, Sigma, Germany). To interfere with group I  
885 metabotropic glutamate receptor (mGluR) signaling we used bath application of either the mGlu<sub>1</sub>  
886 receptor antagonist YM298198 (1  $\mu$ M, Tocris, Germany) or the mGlu<sub>5</sub> receptor antagonist MPEP (10  
887  $\mu$ M, Tocris, Germany) alone, or both blocker simultaneously (the substances were bath applied for a  
888 minimum of 15 min prior and during STDP recordings). IP3 receptors were blocked by bath  
889 application of 2-APB (100  $\mu$ M, Tocris, Germany, micro-perfusion pump), 2-APB was applied at least  
890 15 min prior t-LTP induction and was present throughout the recordings. Intracellular infusion of  
891 ryanodine (100  $\mu$ M, Tocris, Germany, infusion for 15 min) was used to block ryanodine receptors of  
892 internal calcium stores. Where appropriate, respective controls were performed with ACSF or  
893 internal solution containing the same final concentration of DMSO as used for the drug containing  
894 solution (i.e. solvent controls) using the same perfusion conditions.

895

896 We investigated dopaminergic neuromodulation of STDP by bath application of specific antagonists  
897 for D1-like (SCH23390, SCH; 10  $\mu$ M, Sigma) and D2-like dopamine receptors (Sulpiride, Sulp; 10  $\mu$ M,  
898 Sigma, substances were applied for at least 15 min prior STDP recordings). The contribution of  
899 BDNF/TrkB signaling was tested by bath application a scavenger of endogenous BDNF (recombinant  
900 human TrkB Fc chimera, R&D Systems, Germany). For scavenging of BDNF, slices were pre-incubated  
901 for at least 3h with 5 $\mu$ g/ml TrkB-Fc, and subsequent recordings were performed in the presence of  
902 100 ng/ml TrkB-Fc (compare Edelmann et al., 2015). Positive controls were recorded in slices kept  
903 under the same regime, but without the addition of TrkB-Fc. To test low repeat t-LTP under  
904 conditions of chronic 50% BDNF reduction, we used heterozygous BDNF <sup>+/-</sup> mice and respective  
905 wildtype littermates as described previously (Edelmann et al., 2015).

906 The contribution of activity-dependent incorporation of GluA1 subunit containing AMPA receptors to  
907 expression of low repeat t-LTP was verified by postsynaptic application of Pep1-TGL (100  $\mu$ M, Tocris,  
908 Germany) via the patch pipette solution. To investigate a possible role of GluA2 lacking calcium  
909 permeable (cp-) AMPA receptors, we use bath applied NASPM (1-Naphtyl acetyl spermine  
910 trihydrochloride, 100  $\mu$ M, Tocris, Germany) or IEM-1460 (*N,N,H*,-Trimethyl-5-  
911 [(tricyclo[3.3.1.13,7]dec-1-ylmethyl)amino]-1-pentanaminiumbromide hydrobromide, 100  $\mu$ M,  
912 Tocris, Germany).

913

#### 914 **Data acquisition and Data Analysis**

915 Data were filtered at 3 kHz using a patch clamp amplifier (EPC-8, HEKA, Germany) connected to a  
916 LiH8+8 interface and digitized at 10 kHz using PATCHMASTER software (HEKA, Germany). Data  
917 analysis was performed with Fitmaster software (HEKA, Germany). All experiments were performed  
918 in the current clamp mode, except for paired pulse ratio (PPR) that was recorded in the voltage  
919 clamp mode at -70 mV holding potential, and AMPA/NMDA receptor current ratios that were  
920 recorded in voltage clamp at -70 mV and -20 mV holding potential. The holding potential for  
921 recording of NMDAR currents was set to the maximal depolarized value (i.e. -20mV) that allow stable



922 recordings in spite of activated voltage gated  $K^+$  currents. We did not replace  $K^+$  for  $Cs^+$  in our internal  
923 solutions, since we wanted to elicit LTP under physiological conditions and AMPAR/NMDAR current  
924 ratio had to be measured before and 30 min after t-LTP induction. Input resistance was monitored by  
925 hyperpolarizing current steps (250 ms; 20 pA), elicited prior to evoked EPSP responses. The average  
926 slope calculated from 10 min control recording (baseline) were set to 100% and all subsequent EPSP  
927 slopes of a cell were expressed as percentage of baseline slopes. Synaptic strength was calculated  
928 from the mean EPSP slopes 20-30 min (or 50-60 min) after STDP induction, divided by the mean EPSP  
929 slope measured during 10 min before STDP stimulation (baseline). Spike timing intervals (i.e.  $\Delta t$ , ms)  
930 were measured as the time between onset of the evoked EPSP and the peak of the first action  
931 potential. Cells were only included for analysis if the initial resting membrane potential (RMP) was  
932 between -55 and -70 mV. Cells were excluded when the input resistance varied more than 25% over  
933 the entire experiment. Furthermore, traces showing visible “run-up” or “run-down” during baseline  
934 recording were excluded. Data were binned at 1 min intervals.

935 AMPA/NMDA receptor mediated current ratios were calculated from the peak current amplitudes of  
936 the fast AMPA receptor mediated components evoked at a holding potential of -70 mV divided by  
937 the amplitudes of the NMDAR mediated slow current components measured after 50 ms of the  
938 onset of the EPSCs at a holding potential of -20 mV. Selectivity of this procedure for AMPAR and  
939 NMDAR mediated currents was confirmed by bath application of either 50  $\mu$ M APV or 10  $\mu$ M NBQX  
940 in selected experiments (compare Edelman et al., 2015).

941 For analysis of presynaptic short-term plasticity before and after t-LTP induction, paired pulse  
942 facilitation was recorded in voltage clamp mode at a holding potential of -70 mV, and the paired  
943 pulse ratio (PPR) was determined by dividing the peak current amplitudes of the second EPSC by the  
944 first EPSC at an inter-stimulus interval of 50 ms.

945 To further check for a presynaptic LTP expression locus of the 6x 1:1 t-LTP, coefficient of variance  
946 (CV) analysis was performed. CV is expressed as standard deviation/mean (Faber and Korn, 1991).  
947 The ratio of  $CV^2$  before and after the pairing (20-30 min after induction) was plotted against the  
948 respective ratio of mean EPSP slopes (EPSP after/EPSP baseline, Malinow and Tsien, 1990; Manabe et



949 al., 1993).  $CV^2$  ratio was calculated by dividing  $1/CV^2$  after LTP with  $1/CV^2$  of baseline. Presynaptic LTP  
950 is supposed to influence  $CV^2$  more strongly than the EPSP amplitude so that values lie on or above  
951 the diagonal line of unity (Bender et al., 2009; compare Edelman et al., 2015). As an additional  
952 measure for possible t-LTP induced presynaptic changes, putative miniature synaptic currents  
953 (“miniature” EPSCs; cut-off amplitude: 15pA to minimize analyses of evoked responses) were  
954 analyzed with the Minianalysis program (Synaptosoft, USA) from 3 min of continuous recordings  
955 before and 30 min after t-LTP induction. Cumulative fraction plots for amplitudes and inter-event  
956 intervals (IEI) were generated. TTX was omitted when recording mEPSCs to allow STDP induction  
957 under physiological conditions.

958 To verify independent expression of the two low repeat paradigms, we performed an occlusion  
959 approach. Here we subsequently induced first 6 x 1:1 t-LTP and 25 min later the 6 x 1:4 t-LTP in the  
960 same cell and compared the change in synaptic strength by the two protocols.

961

962 To assure reproducibility of results, data for experiments shown in **Figs. 1, 3, 5, 8** and **S1** were pooled  
963 from 2 or 3 independent experimenters, blind to the results of the other(s).

964

## 965 **Statistics**

966 Statistical analysis was performed using GraphPad Prism version 6.0 (GraphPad Software, USA) or  
967 JMP 8 (SAS Institute Inc., USA). Pooled data of experiments from at least three different animals are  
968 expressed as mean  $\pm$  SEM. Paired and unpaired two tailed t-tests were used for data with normal  
969 distribution. Otherwise nonparametric Mann-Whitney U-test was applied. Multiple comparisons  
970 were assessed with a one-way analysis of variance (ANOVA), followed by a post hoc t-test Dunnet’s  
971 test, or Kruskal-Wallis test, followed by post hoc Dunn’s test for parametric and nonparametric data.  
972 A p-value  $<0.05$  was set as level of significance and is indicated by an asterisk. The actual statistic  
973 procedures used for each experiment are mentioned in the text. The respective number of  
974 experiments (n) and the number of animals (N) is reported in the figure legends.

975

976 **Acknowledgments:**

977 The project was funded by the federal state of Saxony-Anhalt and the “European Regional  
978 Developmental Fund (ERDF 2014-2020), Project: Center for Behavioral Brain Sciences (CBBS) FKS:  
979 ZS/2016/04/78113; by the federal state Saxony-Anhalt and the European Structural and Investment  
980 Funds (ESF, 2014-2020), project number ZS/2016/08/80645 and by the DFG ED 280/1-1 and  
981 SFB779/B06. The authors thank Regina Ziegler for excellent technical assistance.

982

983 CRediT

984 Conceptualization: VL, EE; Methodology: VL, EE and EC-P; Investigation: EC-P, BK, GQ, SB with help by  
985 EE; Writing: EE, VL, with help by EC-P; Funding Acquisition: VL, EE; Resources: VL; Supervision: VL, EE.

986

987 The authors declare no competing interests.

988

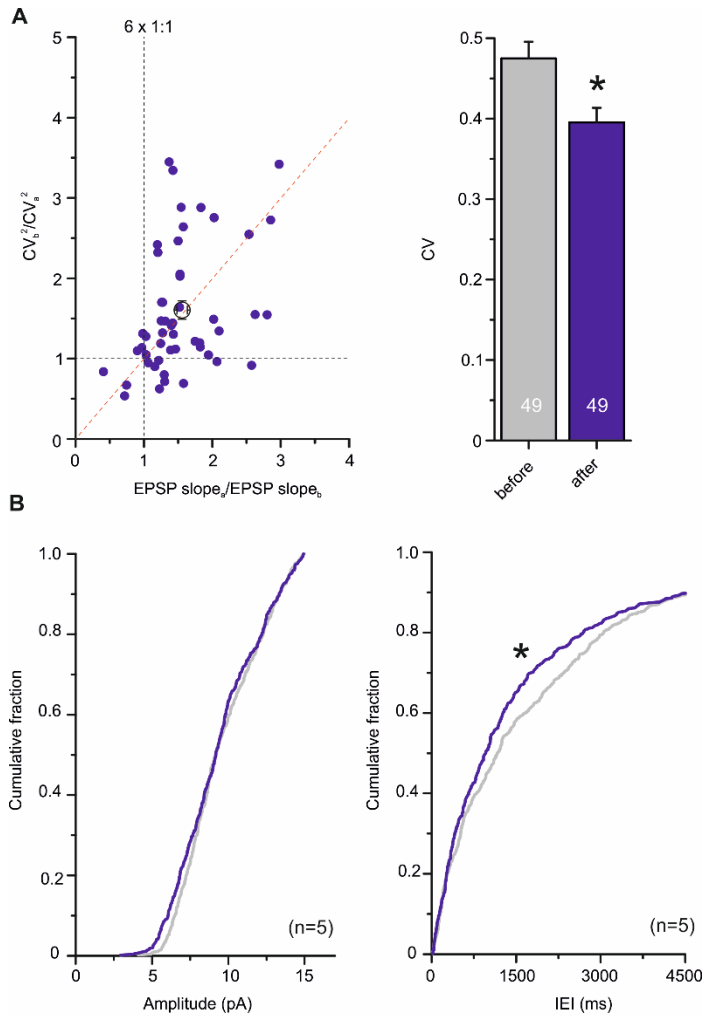

989

990 **Figure S1: Evidence for presynaptic expression locus of 6 x 1:1 t-LTP. A)**  $CV^2$  analysis. Left: Each point  
991 represents an individual cell subjected to 6 x 1:1 t-LTP stimulation. X-axis: magnitude of potentiation;  
992 y-axis: change in coefficient of variation. All points on or above the diagonal red line indicate  
993 presynaptic expression of 6x 1:1 t-LTP in the respective cell. Right: the average over all cells revealed a  
994 significant decrease of CV after t-LTP induction, being consistent with a presynaptic change. B)  
995 Cumulative fraction of mEPSC amplitudes (left) and interevent intervals (IEI; right) before and after 6  
996 x 1:1 t-LTP induction. Blue color indicates cumulative probability after t-LTP induction (grey line:  
997 before t-LTP induction). The decrease in IEI (reflecting increased mEPSC frequencies) in the absence of  
998 change in mEPSC amplitudes (left) is consistent with a presynaptic change. Data are expressed as  
999 mean  $\pm$  SEM. The analysis shows the results from 49 cells (in A) and 5 cells (B) from at least 3 different  
1000 animals.

1001

1002

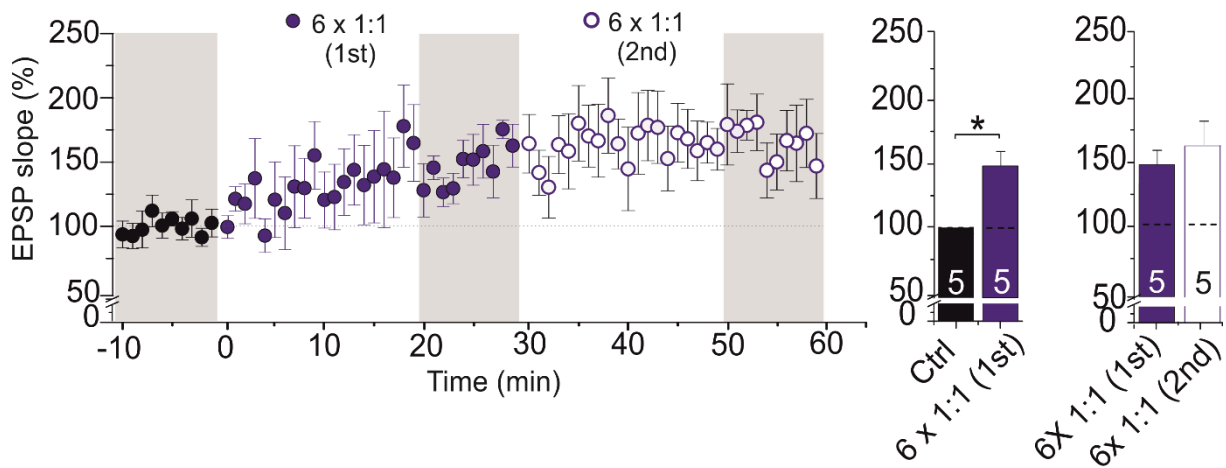

1003

1004 **Figure S2: Two subsequent stimulations with the 6 x 1:1 t-LTP protocol do not yield additional**  
1005 **potentiation.** SC-CA1 synapses were recorded as in **figure 8**, and 6 x 1:1 t-LTP stimulation was  
1006 performed at 0 and 30 min in the same cells (n=5 / N= 3). The second induction protocol did not  
1007 significantly increase the magnitude of t-LTP that was reached after the first t-LTP induction. Note  
1008 that subsequent stimulations with the 6x 1:1 protocol followed by the 6 x 1:4 protocol in the same  
1009 cells yielded additional and independent potentiation (compare **Fig. 8**). Average time course of  
1010 potentiation and mean ( $\pm$  SEM) magnitude of t-LTP are shown for the respective experiments.

1011

1012

## 1013 References

- 1014 Artola, A., and Singer, W. (1993). Long-term depression of excitatory synaptic transmission and its  
1015 relationship to long-term potentiation. *Trends Neurosci* 16, 480-487.
- 1016 Balkowiec, A., and Katz, D.M. (2002). Cellular mechanisms regulating activity-dependent release of  
1017 native brain-derived neurotrophic factor from hippocampal neurons. *J Neurosci* 22, 10399-10407.
- 1018 Balschun, D., Manahan-Vaughan, D., Wagner, T., Behnisch, T., Reymann, K.G., and Wetzell, W. (1999).  
1019 A specific role for group I mGluRs in hippocampal LTP and hippocampus-dependent spatial learning.  
1020 *Learn Memory* 6, 138-152.
- 1021 Banerjee, A., Meredith, R.M., Rodriguez-Moreno, A., Mierau, S.B., Auberson, Y.P., and Paulsen, O.  
1022 (2009). Double dissociation of spike timing-dependent potentiation and depression by subunit-  
1023 preferring NMDA receptor antagonists in mouse barrel cortex. *Cereb Cortex* 19, 2959-2969.
- 1024 Beaulieu, J.M., and Gainetdinov, R.R. (2011). The physiology, signaling, and pharmacology of  
1025 dopamine receptors. *Pharmacol Rev* 63, 182-217.
- 1026 Bender, V.A., Bender, K.J., Brasier, D.J., and Feldman, D.E. (2006). Two coincidence detectors for  
1027 spike timing-dependent plasticity in somatosensory cortex. *J Neurosci* 26, 4166-4177.
- 1028 Bender, V.A., Pugh, J.R., and Jahr, C.E. (2009). Presynaptically expressed long-term potentiation  
1029 increases multivesicular release at parallel fiber synapses. *J Neurosci* 29, 10974-10978.
- 1030 Bi, G.Q., and Poo, M.M. (1998). Synaptic modifications in cultured hippocampal neurons:  
1031 dependence on spike timing, synaptic strength, and postsynaptic cell type. *J Neurosci* 18, 10464-  
1032 10472.
- 1033 Bi, G.Q., and Poo, M.M. (2001). Synaptic modification by correlated activity: Hebb's postulate  
1034 revisited. *Annu Rev Neurosci* 24, 139-166.
- 1035 Bittner, K.C., Grienberger, C., Vaidya, S.P., Milstein, A.D., Macklin, J.J., Suh, J., Tonegawa, S., and  
1036 Magee, J.C. (2015). Conjunctive input processing drives feature selectivity in hippocampal CA1  
1037 neurons. *Nat Neurosci* 18, 1133-1142.
- 1038 Bittner, K.C., Milstein, A.D., Grienberger, C., Romani, S., and Magee, J.C. (2017). Behavioral time scale  
1039 synaptic plasticity underlies CA1 place fields. *Science* 357, 1033-1036.
- 1040 Bliss, T.V., and Cooke, S.F. (2011). Long-term potentiation and long-term depression: a clinical  
1041 perspective. *Clinics (Sao Paulo)* 66 Suppl 1, 3-17.
- 1042 Bliss, T.V., and Lomo, T. (1973). Long-lasting potentiation of synaptic transmission in the dentate area  
1043 of the anaesthetized rabbit following stimulation of the perforant path. *J Physiol* 232, 331-356.
- 1044 Brigadski T, Lichtenecker, P., Lessmann, V. (2019) Recording activity-dependent release of BDNF from  
1045 hippocampal neurons. *Neuromethods book Brain-derived neurotrophic factor (BDNF)*. Edited by  
1046 Carlos B. Duarte, Enrico Tongiorgi (143 )
- 1047 Brzosko, Z., Schultz, W., and Paulsen, O. (2015). Retroactive modulation of spike timing-dependent  
1048 plasticity by dopamine. *Elife* 4.
- 1049 Buchanan, K.A., and Mellor, J.R. (2007). The development of synaptic plasticity induction rules and  
1050 the requirement for postsynaptic spikes in rat hippocampal CA1 pyramidal neurones. *J Physiol* 585,  
1051 429-445.
- 1052 Caporale, N., and Dan, Y. (2008). Spike timing-dependent plasticity: a Hebbian learning rule. *Annu*  
1053 *Rev Neurosci* 31, 25-46.
- 1054 Carlisle, H.J., Fink, A.E., Grant, S.G., and O'Dell, T.J. (2008). Opposing effects of PSD-93 and PSD-95 on  
1055 long-term potentiation and spike timing-dependent plasticity. *J Physiol* 586, 5885-5900.

- 1056 Cassenaer, S., and Laurent, G. (2012). Conditional modulation of spike-timing-dependent plasticity  
1057 for olfactory learning. *Nature* 482, 47-52.
- 1058 Chater, T.E., and Goda, Y. (2014). The role of AMPA receptors in postsynaptic mechanisms of synaptic  
1059 plasticity. *Front Cell Neurosci* 8, 401.
- 1060 Costa, R.P., Mizusaki, B.E., Sjostrom, P.J., and van Rossum, M.C. (2017). Functional consequences of  
1061 pre- and postsynaptic expression of synaptic plasticity. *Philos Trans R Soc Lond B Biol Sci* 372.
- 1062 Couey, J.J., Meredith, R.M., Spijker, S., Poorthuis, R.B., Smit, A.B., Brussaard, A.B., and Mansvelder,  
1063 H.D. (2007). Distributed network actions by nicotine increase the threshold for spike-timing-  
1064 dependent plasticity in prefrontal cortex. *Neuron* 54, 73-87.
- 1065 Cui, Y., Paille, V., Xu, H., Genet, S., Delord, B., Fino, E., Berry, H., and Venance, L. (2015).  
1066 Endocannabinoids mediate bidirectional striatal spike-timing dependent plasticity. *J Physiol*.
- 1067 Cui, Y., Prokin, I., Xu, H., Delord, B., Genet, S., Venance, L., and Berry, H. (2016). Endocannabinoid  
1068 dynamics gate spike-timing dependent depression and potentiation. *Elife* 5, e13185.
- 1069 Debanne, D., Gähwiler, B.H., and Thompson, S.M. (1998). Long-term synaptic plasticity between pairs  
1070 of individual CA3 pyramidal cells in rat hippocampal slice cultures. *J Physiol* 507 ( Pt 1), 237-247.
- 1071 Drew, P.J., and Abbott, L.F. (2006). Extending the effects of spike-timing-dependent plasticity to  
1072 behavioral timescales. *Proc Natl Acad Sci U S A* 103, 8876-8881.
- 1073 Dubovyk, V., and Manahan-Vaughan, D. (2018). Less means more: The magnitude of synaptic  
1074 plasticity along the hippocampal dorso-ventral axis is inversely related to the expression levels of  
1075 plasticity-related neurotransmitter receptors. *Hippocampus* 28, 136-150.
- 1076 Dubovyk, V., and Manahan-Vaughan, D. (2019). Gradient of Expression of Dopamine D2 Receptors  
1077 Along the Dorso-Ventral Axis of the Hippocampus. *Front Synaptic Neurosci* 11, 28.
- 1078 Dudman, J.T., Tsay, D., and Siegelbaum, S.A. (2007). A role for synaptic inputs at distal dendrites:  
1079 instructive signals for hippocampal long-term plasticity. *Neuron* 56, 866-879.
- 1080 Edelmann, E., Cepeda-Prado, E., Franck, M., Lichtenegger, P., Brigadski, T., and Lessmann, V. (2015).  
1081 Theta Burst Firing Recruits BDNF Release and Signaling in Postsynaptic CA1 Neurons in Spike-Timing-  
1082 Dependent LTP. *Neuron* 86, 1041-1054.
- 1083 Edelmann, E., Cepeda-Prado, E., and Lessmann, V. (2017). Coexistence of Multiple Types of Synaptic  
1084 Plasticity in Individual Hippocampal CA1 Pyramidal Neurons. *Front Synaptic Neurosci* 9, 7.
- 1085 Edelmann, E., and Lessmann, V. (2011). Dopamine Modulates Spike Timing-Dependent Plasticity and  
1086 Action Potential Properties in CA1 Pyramidal Neurons of Acute Rat Hippocampal Slices. *Front*  
1087 *Synaptic Neurosci* 3, 6.
- 1088 Edelmann, E., and Lessmann, V. (2013). Dopamine regulates intrinsic excitability thereby gating  
1089 successful induction of spike timing-dependent plasticity in CA1 of the hippocampus. *Front Neurosci*  
1090 7, 25.
- 1091 Edelmann, E., and Lessmann, V. (2018). Dopaminergic innervation and modulation of hippocampal  
1092 networks. *Cell Tissue Res* 373, 711-727.
- 1093 Edelmann, E., Lessmann, V., and Brigadski, T. (2014). Pre- and postsynaptic twists in BDNF secretion  
1094 and action in synaptic plasticity. *Neuropharmacology* 76 Pt C, 610-627.
- 1095 Endres, T., and Lessmann, V. (2012). Age-dependent deficits in fear learning in heterozygous BDNF  
1096 knock-out mice. *Learn Mem* 19, 561-570.
- 1097 Faber, D.S., and Korn, H. (1991). Applicability of the coefficient of variation method for analyzing  
1098 synaptic plasticity. *Biophys J* 60, 1288-1294.

- 1099 Feldman, D.E. (2000). Timing-based LTP and LTD at vertical inputs to layer II/III pyramidal cells in rat  
1100 barrel cortex. *Neuron* 27, 45-56.
- 1101 Feldman, D.E. (2012). The spike-timing dependence of plasticity. *Neuron* 75, 556-571.
- 1102 Fino, E., and Venance, L. (2010). Spike-timing dependent plasticity in the striatum. *Front Synaptic*  
1103 *Neurosci* 2, 6.
- 1104 Froemke, R.C., Tsay, I.A., Raad, M., Long, J.D., and Dan, Y. (2006). Contribution of individual spikes in  
1105 burst-induced long-term synaptic modification. *J Neurophysiol* 95, 1620-1629.
- 1106 Gao, J., Voss, A.A., Pessah, I.N., Lauer, F.T., Penning, T.M., and Burchiel, S.W. (2005). Ryanodine  
1107 receptor-mediated rapid increase in intracellular calcium induced by 7,8-benzo(a)pyrene quinone in  
1108 human and murine leukocytes. *Toxicol Sci* 87, 419-426.
- 1109 Gerstner, W., Lehmann, M., Liakoni, V., Corneil, D., and Brea, J. (2018). Eligibility Traces and Plasticity  
1110 on Behavioral Time Scales: Experimental Support of NeoHebbian Three-Factor Learning Rules. *Front*  
1111 *Neural Circuits* 12, 53.
- 1112 Gottmann, K., Mittmann, T., and Lessmann, V. (2009). BDNF signaling in the formation, maturation  
1113 and plasticity of glutamatergic and GABAergic synapses. *Exp Brain Res* 199, 203-234.
- 1114 Granger, A.J., and Nicoll, R.A. (2014). Expression mechanisms underlying long-term potentiation: a  
1115 postsynaptic view, 10 years on. *Philos T R Soc B* 369.
- 1116 Hagen, H., and Manahan-Vaughan, D. (2016). Dopamine D1/D5, But not D2/D3, Receptor  
1117 Dependency of Synaptic Plasticity at Hippocampal Mossy Fiber Synapses that Is Enabled by Patterned  
1118 Afferent Stimulation, or Spatial Learning. *Front Synaptic Neurosci* 8, 31.
- 1119 Hayashi, Y., Shi, S.H., Esteban, J.A., Piccini, A., Poncer, J.C., and Malinow, R. (2000). Driving AMPA  
1120 receptors into synapses by LTP and CaMKII: requirement for GluR1 and PDZ domain interaction.  
1121 *Science* 287, 2262-2267.
- 1122 He, K., Huertas, M., Hong, S.Z., Tie, X., Hell, J.W., Shouval, H., and Kirkwood, A. (2015). Distinct  
1123 Eligibility Traces for LTP and LTD in Cortical Synapses. *Neuron* 88, 528-538.
- 1124 Herring, B.E., and Nicoll, R.A. (2016). Long-Term Potentiation: From CaMKII to AMPA Receptor  
1125 Trafficking. *Annu Rev Physiol* 78, 351-365.
- 1126 Jong, Y.J., Sergin, I., Purgert, C.A., and O'Malley, K.L. (2014). Location-dependent signaling of the  
1127 group 1 metabotropic glutamate receptor mGlu5. *Mol Pharmacol* 86, 774-785.
- 1128 Kaar, A., and Rae, M.G. (2015). Metabotropic glutamate receptor-mediated cyclic ADP ribose  
1129 signalling. *Biochem Soc Trans* 43, 405-409.
- 1130 Kauer, J.A., and Malenka, R.C. (2006). LTP: AMPA receptors trading places. *Nat Neurosci* 9, 593-594.
- 1131 Korte, M., Carroll, P., Wolf, E., Brem, G., Thoenen, H., and Bonhoeffer, T. (1995). Hippocampal long-  
1132 term potentiation is impaired in mice lacking brain-derived neurotrophic factor. *Proc Natl Acad Sci U*  
1133 *S A* 92, 8856-8860.
- 1134 Lalanne, T., Oyrer, J., Farrant, M., and Sjöström, P.J. (2018). Synapse Type-Dependent Expression of  
1135 Calcium-Permeable AMPA Receptors. *Front Synaptic Neurosci* 10, 34.
- 1136 Lee, H.K., and Kirkwood, A. (2011). AMPA receptor regulation during synaptic plasticity in  
1137 hippocampus and neocortex. *Semin Cell Dev Biol* 22, 514-520.
- 1138 Lessmann, V., Gottmann, K., and Malcangio, M. (2003). Neurotrophin secretion: current facts and  
1139 future prospects. *Prog Neurobiol* 69, 341-374.
- 1140 Lisman, J. (1989). A mechanism for the Hebb and the anti-Hebb processes underlying learning and  
1141 memory. *Proc Natl Acad Sci U S A* 86, 9574-9578.



- 1142 Liu, Y., Cui, L., Schwarz, M.K., Dong, Y., and Schluter, O.M. (2017). Adrenergic Gate Release for Spike  
1143 Timing-Dependent Synaptic Potentiation. *Neuron* 93, 394-408.
- 1144 Lu, H., Park, H., and Poo, M.M. (2014). Spike-timing-dependent BDNF secretion and synaptic  
1145 plasticity. *Philos Trans R Soc Lond B Biol Sci* 369, 20130132.
- 1146 Lynch, M.A. (2004). Long-term potentiation and memory. *Physiol Rev* 84, 87-136.
- 1147 Magee, J.C., and Johnston, D. (1997). A synaptically controlled, associative signal for Hebbian  
1148 plasticity in hippocampal neurons. *Science* 275, 209-213.
- 1149 Malenka, R.C., and Bear, M.F. (2004). LTP and LTD: an embarrassment of riches. *Neuron* 44, 5-21.
- 1150 Malinow, R., and Tsien, R.W. (1990). Presynaptic enhancement shown by whole-cell recordings of  
1151 long-term potentiation in hippocampal slices. *Nature* 346, 177-180.
- 1152 Man, H.Y. (2011). GluA2-lacking, calcium-permeable AMPA receptors--inducers of plasticity? *Curr  
1153 Opin Neurobiol* 21, 291-298.
- 1154 Manabe, T., Wyllie, D.J., Perkel, D.J., and Nicoll, R.A. (1993). Modulation of synaptic transmission and  
1155 long-term potentiation: effects on paired pulse facilitation and EPSC variance in the CA1 region of the  
1156 hippocampus. *J Neurophysiol* 70, 1451-1459.
- 1157 Markram, H., Gerstner, W., and Sjöström, P.J. (2011). A history of spike-timing-dependent plasticity.  
1158 *Front Synaptic Neurosci* 3, 4.
- 1159 Meis, S., Endres, T., and Lessmann, V. (2012). Postsynaptic BDNF signalling regulates long-term  
1160 potentiation at thalamo-amygdala afferents. *J Physiol* 590, 193-208.
- 1161 Meredith, R.M., Floyer-Lea, A.M., and Paulsen, O. (2003). Maturation of long-term potentiation  
1162 induction rules in rodent hippocampus: role of GABAergic inhibition. *J Neurosci* 23, 11142-11146.
- 1163 Missale, C., Nash, S.R., Robinson, S.W., Jaber, M., and Caron, M.G. (1998). Dopamine receptors: from  
1164 structure to function. *Physiol Rev* 78, 189-225.
- 1165 Morita, D., Rah, J.C., and Isaac, J.T. (2014). Incorporation of inwardly rectifying AMPA receptors at  
1166 silent synapses during hippocampal long-term potentiation. *Philos Trans R Soc Lond B Biol Sci* 369,  
1167 20130156.
- 1168 Mu, Y., and Poo, M.M. (2006). Spike timing-dependent LTP/LTD mediates visual experience-  
1169 dependent plasticity in a developing retinotectal system. *Neuron* 50, 115-125.
- 1170 Nanou, E., Scheuer, T., and Catterall, W.A. (2016). Calcium sensor regulation of the CaV2.1 Ca<sup>2+</sup>  
1171 channel contributes to long-term potentiation and spatial learning. *Proc Natl Acad Sci U S A* 113,  
1172 13209-13214.
- 1173 Nevian, T., and Sakmann, B. (2006). Spine Ca<sup>2+</sup> signaling in spike-timing-dependent plasticity. *J  
1174 Neurosci* 26, 11001-11013.
- 1175 Neyman, S., and Manahan-Vaughan, D. (2008). Metabotropic glutamate receptor 1 (mGluR1) and 5  
1176 (mGluR5) regulate late phases of LTP and LTD in the hippocampal CA1 region in vitro. *Eur J Neurosci*  
1177 27, 1345-1352.
- 1178 Nicoll, R.A. (2003). Expression mechanisms underlying long-term potentiation: a postsynaptic view.  
1179 *Philos T R Soc B* 358, 721-726.
- 1180 Nicoll, R.A., and Malenka, R.C. (1995). Contrasting properties of two forms of long-term potentiation  
1181 in the hippocampus. *Nature* 377, 115-118.
- 1182 Nyberg, L., Karalija, N., Salami, A., Andersson, M., Wahlin, A., Kaboovand, N., Kohncke, Y., Axelsson,  
1183 J., Rieckmann, A., Papenberg, G., *et al.* (2016). Dopamine D2 receptor availability is linked to  
1184 hippocampal-caudate functional connectivity and episodic memory. *Proc Natl Acad Sci U S A* 113,  
1185 7918-7923.



- 1186 Otmakhov, N., and Lisman, J.E. (2002). Postsynaptic application of a cAMP analogue reverses long-  
1187 term potentiation in hippocampal CA1 pyramidal neurons. *J Neurophysiol* 87, 3018-3032.
- 1188 Otmakhova, N.A., Otmakhov, N., Mortenson, L.H., and Lisman, J.E. (2000). Inhibition of the cAMP  
1189 pathway decreases early long-term potentiation at CA1 hippocampal synapses. *J Neurosci* 20, 4446-  
1190 4451.
- 1191 Otto, T., Eichenbaum, H., Wiener, S.I., and Wible, C.G. (1991). Learning-related patterns of CA1 spike  
1192 trains parallel stimulation parameters optimal for inducing hippocampal long-term potentiation.  
1193 *Hippocampus* 1, 181-192.
- 1194 Papaleonidopoulos, V., Kouvaros, S., and Papatheodoropoulos, C. (2018). Effects of endogenous and  
1195 exogenous D1/D5 dopamine receptor activation on LTP in ventral and dorsal CA1 hippocampal  
1196 synapses. *Synapse* 72, e22033.
- 1197 Park, H., and Poo, M.M. (2013). Neurotrophin regulation of neural circuit development and function.  
1198 *Nat Rev Neurosci* 14, 7-23.
- 1199 Park, P., Kang, H., Sanderson, T.M., Bortolotto, Z.A., Georgiou, J., Zhuo, M., Kaang, B.K., and  
1200 Collingridge, G.L. (2018). The Role of Calcium-Permeable AMPARs in Long-Term Potentiation at  
1201 Principal Neurons in the Rodent Hippocampus. *Front Synaptic Neurosci* 10, 42.
- 1202 Pattwell, S.S., Bath, K.G., Perez-Castro, R., Lee, F.S., Chao, M.V., and Ninan, I. (2012). The BDNF  
1203 Val66Met Polymorphism Impairs Synaptic Transmission and Plasticity in the Infralimbic Medial  
1204 Prefrontal Cortex. *J Neurosci* 32, 2410-2421.
- 1205 Pawlak, V., and Kerr, J.N. (2008). Dopamine receptor activation is required for corticostriatal spike-  
1206 timing-dependent plasticity. *J Neurosci* 28, 2435-2446.
- 1207 Pike, F.G., Meredith, R.M., Olding, A.W., and Paulsen, O. (1999). Rapid report: postsynaptic bursting  
1208 is essential for 'Hebbian' induction of associative long-term potentiation at excitatory synapses in rat  
1209 hippocampus. *J Physiol* 518 ( Pt 2), 571-576.
- 1210 Pinar, C., Fontaine, C.J., Trivino-Paredes, J., Lottenberg, C.P., Gil-Mohapel, J., and Christie, B.R. (2017).  
1211 Revisiting the flip side: Long-term depression of synaptic efficacy in the hippocampus. *Neurosci*  
1212 *Biobehav Rev* 80, 394-413.
- 1213 Plant, K., Pelkey, K.A., Bortolotto, Z.A., Morita, D., Terashima, A., McBain, C.J., Collingridge, G.L., and  
1214 Isaac, J.T. (2006). Transient incorporation of native GluR2-lacking AMPA receptors during  
1215 hippocampal long-term potentiation. *Nat Neurosci* 9, 602-604.
- 1216 Psotta, L., Rockahr, C., Gruss, M., Kirches, E., Braun, K., Lessmann, V., Bock, J., and Endres, T. (2015).  
1217 Impact of an additional chronic BDNF reduction on learning performance in an Alzheimer mouse  
1218 model. *Front Behav Neurosci* 9, 58.
- 1219 Remy, S., and Spruston, N. (2007). Dendritic spikes induce single-burst long-term potentiation. *Proc*  
1220 *Natl Acad Sci U S A* 104, 17192-17197.
- 1221 Rosen, Z.B., Cheung, S., and Siegelbaum, S.A. (2015). Midbrain dopamine neurons bidirectionally  
1222 regulate CA3-CA1 synaptic drive. *Nat Neurosci* 18, 1763-1771.
- 1223 Schildt, S., Endres, T., Lessmann, V., and Edelmann, E. (2013). Acute and chronic interference with  
1224 BDNF/TrkB-signaling impair LTP selectively at mossy fiber synapses in the CA3 region of mouse  
1225 hippocampus. *Neuropharmacology* 71, 247-254.
- 1226 Seol, G.H., Ziburkus, J., Huang, S., Song, L., Kim, I.T., Takamiya, K., Huganir, R.L., Lee, H.K., and  
1227 Kirkwood, A. (2007). Neuromodulators control the polarity of spike-timing-dependent synaptic  
1228 plasticity. *Neuron* 55, 919-929.
- 1229 Shi, S., Hayashi, Y., Esteban, J.A., and Malinow, R. (2001). Subunit-specific rules governing AMPA  
1230 receptor trafficking to synapses in hippocampal pyramidal neurons. *Cell* 105, 331-343.

- 1231 Shindou, T., Shindou, M., Watanabe, S., and Wickens, J. (2019). A silent eligibility trace enables  
1232 dopamine-dependent synaptic plasticity for reinforcement learning in the mouse striatum. *Eur J*  
1233 *Neurosci* 49, 726-736.
- 1234 Sivakumaran, S., Mohajerani, M.H., and Cherubini, E. (2009). At immature mossy-fiber-CA3 synapses,  
1235 correlated presynaptic and postsynaptic activity persistently enhances GABA release and network  
1236 excitability via BDNF and cAMP-dependent PKA. *J Neurosci* 29, 2637-2647.
- 1237 Sokoloff, P., Diaz, J., Le Foll, B., Guillin, O., Leriche, L., Bezard, E., and Gross, C. (2006). The dopamine  
1238 D3 receptor: a therapeutic target for the treatment of neuropsychiatric disorders. *CNS Neurol Disord*  
1239 *Drug Targets* 5, 25-43.
- 1240 Solinas, S.M.G., Edelman, E., Lessmann, V., and Migliore, M. (2019). A kinetic model for Brain-  
1241 Derived Neurotrophic Factor mediated spike timing-dependent LTP. *PLoS Comput Biol* 15, e1006975.
- 1242 Suzuki, T., Miura, M., Nishimura, K., and Aosaki, T. (2001). Dopamine-dependent synaptic plasticity in  
1243 the striatal cholinergic interneurons. *J Neurosci* 21, 6492-6501.
- 1244 Takechi, H., Eilers, J., and Konnerth, A. (1998). A new class of synaptic response involving calcium  
1245 release in dendritic spines. *Nature* 396, 757-760.
- 1246 Tigaret, C.M., Olivo, V., Sadowski, J., Ashby, M.C., and Mellor, J.R. (2016). Coordinated activation of  
1247 distinct Ca(2+) sources and metabotropic glutamate receptors encodes Hebbian synaptic plasticity.  
1248 *Nat Commun* 7, 10289.
- 1249 Tonegawa, S., Morrissey, M.D., and Kitamura, T. (2018). The role of engram cells in the systems  
1250 consolidation of memory. *Nat Rev Neurosci* 19, 485-498.
- 1251 Tritsch, N.X., and Sabatini, B.L. (2012). Dopaminergic modulation of synaptic transmission in cortex  
1252 and striatum. *Neuron* 76, 33-50.
- 1253 Wang, H., Ardiles, A.O., Yang, S., Tran, T., Posada-Duque, R., Valdivia, G., Baek, M., Chuang, Y.A.,  
1254 Palacios, A.G., Gallagher, M., *et al.* (2016). Metabotropic Glutamate Receptors Induce a Form of LTP  
1255 Controlled by Translation and Arc Signaling in the Hippocampus. *J Neurosci* 36, 1723-1729.
- 1256 Wiera, G., Nowak, D., van Hove, I., Dziegiel, P., Moons, L., and Mozrzymas, J.W. (2017). Mechanisms  
1257 of NMDA Receptor- and Voltage-Gated L-Type Calcium Channel-Dependent Hippocampal LTP  
1258 Critically Rely on Proteolysis That Is Mediated by Distinct Metalloproteinases. *J Neurosci* 37, 1240-  
1259 1256.
- 1260 Wittenberg, G.M., and Wang, S.S. (2006). Malleability of spike-timing-dependent plasticity at the  
1261 CA3-CA1 synapse. *J Neurosci* 26, 6610-6617.
- 1262 Xu, T.X., and Yao, W.D. (2010). D1 and D2 dopamine receptors in separate circuits cooperate to drive  
1263 associative long-term potentiation in the prefrontal cortex. *Proc Natl Acad Sci U S A* 107, 16366-  
1264 16371.
- 1265 Yang, K., and Dani, J.A. (2014). Dopamine D1 and D5 receptors modulate spike timing-dependent  
1266 plasticity at medial perforant path to dentate granule cell synapses. *J Neurosci* 34, 15888-15897.
- 1267 Zhang, J.C., Lau, P.M., and Bi, G.Q. (2009). Gain in sensitivity and loss in temporal contrast of STDP by  
1268 dopaminergic modulation at hippocampal synapses. *Proc Natl Acad Sci U S A* 106, 13028-13033.
- 1269
